# Supplementary material
Source: PubMed Central journal article supplement (PMC6865253)
Supplement: jamapsychiatry-77-130-s001.pdf [file jamapsychiatry-77-130-s001.pdf]

1 **USAMRAA W81XWH-15-2-0015**

2 **CLINICAL STUDY PROTOCOL**

3

4

5

---

**Study Title:** A Randomized, Sham-procedure-controlled, Blinded Study  
to Evaluate the Effectiveness and Acceptability of Right-  
sided Stellate Ganglion Block for Treatment of Posttraumatic  
Stress Disorder Symptoms

**Sponsor:** RTI International  
3040 Cornwallis Road  
Research Triangle Park, NC  
27709

**Protocol ID:** SGB-201  
Amendment 2.0 (Eisenhower Regional IRB)

**Principal Investigator:** Bradford B. Walters, MD, PhD  
Telephone: (919) 316-3509  
Fax: (919) 541-1275  
Cell: (919) 614-6273

**Co-Investigator:** Kristine Rae Olmsted  
Telephone: (919) 541-8035  
Fax: (919) 485-5555  
Cell: (919) 632-4079

**Research Monitor:** MAJ Samuel Blacker, MD  
Telephone: (910) 907-7318  
Fax: (910) 907-8570  
Pager: (301) 957-0958

**Protocol Version/Date:** Version #: Amendment 2.0  
March 3, 2018

---

6

7

8

9

10 **REVISION HISTORY**

| Protocol version                   | Protocol Date                                              | Section(s) revised                                 | Description of revision(s)                                                                                                                                                                                                                                                                           |
|------------------------------------|------------------------------------------------------------|----------------------------------------------------|------------------------------------------------------------------------------------------------------------------------------------------------------------------------------------------------------------------------------------------------------------------------------------------------------|
| Original Protocol                  | 11 November, 2010                                          | Not applicable                                     | Not applicable                                                                                                                                                                                                                                                                                       |
| Amendment 1<br><br>October 2, 2015 |                                                            | Protocol Study Locations                           | Text revision.                                                                                                                                                                                                                                                                                       |
|                                    |                                                            | Protocol Additional Co-Investigators               | Text revision.                                                                                                                                                                                                                                                                                       |
|                                    |                                                            | Protocol Table of Contents                         | Deleted 6.2.3.12; Deleted Joggle items; 6.2.3.13 changed to 6.2.3.12; Deleted Appendix 17; re-numbered subsequent appendices accordingly.                                                                                                                                                            |
|                                    |                                                            | Protocol Synopsis                                  | Deleted Joggle text. Added CAPS-5 change. Clarified acceptability target population.                                                                                                                                                                                                                 |
|                                    |                                                            | Protocol Glossary of Abbreviations and Definitions | Deleted Joggle text.                                                                                                                                                                                                                                                                                 |
|                                    |                                                            | Protocol 1.1.1                                     | Specified use of DSM-5.                                                                                                                                                                                                                                                                              |
|                                    |                                                            | Protocol 1.2                                       | Clarified frequency of SGB for PTSD.                                                                                                                                                                                                                                                                 |
|                                    |                                                            | Protocol 2.1                                       | Deleted Joggle text. Clarified timeline for assessments.                                                                                                                                                                                                                                             |
|                                    |                                                            | Protocol 3.1                                       | Added PCL-C to screener. Deleted Joggle text. Deleted Joggle assessments. Clarified that participants remain blinded. Clarified intent of MEDCOM 40-54. Added details regarding study incentives. Clarified participants will remain blinded to intervention. Changed “treatment” to “intervention.” |
|                                    |                                                            | Protocol 3.2                                       | Corrected time for subjective assessment of change (4-week assessment). Revised participant-spouse eligibility criteria. Added text explaining scheduling of focus groups/individual interviews and clarified eligibility for incentive and the amount and delivery method.                          |
| Protocol 4.1.2                     | Revised inclusion criterion. Clarified A-level modalities. |                                                    |                                                                                                                                                                                                                                                                                                      |

| Protocol version | Protocol Date | Section(s) revised | Description of revision(s)                                                                                                    |
|------------------|---------------|--------------------|-------------------------------------------------------------------------------------------------------------------------------|
|                  |               |                    |                                                                                                                               |
|                  |               | Protocol 4.1.3     | Revised final exclusion criterion and added exclusion criterion (PCL-C). Clarified assessment of psychiatric and TBI history. |
|                  |               | Protocol 4.2.2     | Changed Appendix numbering. Changed spouse dyad language.                                                                     |
|                  |               | Protocol 5.3       | Changed “ultrasound-guided” to “ultrasound-visualized.”                                                                       |
|                  |               | Protocol 6.1       | Clarified possibility of randomization to a sham study group. Added language to clarify recruiting process.                   |
|                  |               | Protocol 6.2.2     | Specified no AHLA encounter entered.                                                                                          |
|                  |               | Protocol 6.2.2.4   | Clarified DRP.                                                                                                                |
|                  |               | Protocol 6.2.3     | Deleted Joggle text.                                                                                                          |
|                  |               | Protocol 6.2.3.2   | Clarified use of PCL-5 and PCL-C.                                                                                             |
|                  |               | Protocol 6.2.3.5   | Deleted AUDIT scoring range.                                                                                                  |
|                  |               | Protocol 6.2.3.6   | Deleted K6 scoring range.                                                                                                     |
|                  |               | Protocol 6.2.3.7   | Deleted PHQ-9 scoring range.                                                                                                  |
|                  |               | Protocol 6.2.3.8   | Deleted GAD-7 scoring range.                                                                                                  |
|                  |               | Protocol 6.2.3.10  | Inserted references.                                                                                                          |
|                  |               | Protocol 6.2.3.12  | Deleted Joggle text.                                                                                                          |
|                  |               | Protocol 6.2.3.13  | Changed to 6.2.3.12. Changed Appendix numbering.                                                                              |
|                  |               | Protocol 6.3       | Deleted Joggle text. Changed Appendix numbering. Clarified MEDCOM 40-54.                                                      |
|                  |               | Protocol 6.4       | Changed Appendix numbering.                                                                                                   |
|                  |               | Protocol 6.4.13    | Clarified command contact information to be listed and text of messages.                                                      |
|                  |               | Protocol 6.5.1.1   | Changed Appendix numbering.                                                                                                   |
|                  |               | Protocol 6.5.1.2   | Changed Appendix numbering.                                                                                                   |
|                  |               | Protocol 6.5.1.3   | Changed Appendix numbering.                                                                                                   |
|                  |               | Protocol 6.5.2     | Changed Appendix numbering. Clarified burden for qualitative data collection. Clarified purpose of audio recordings.          |
|                  |               | Protocol 7.2       | Clarified Research Monitor notification.                                                                                      |
|                  |               | Protocol 8.2       | Deleted Joggle text.                                                                                                          |

| Protocol version | Protocol Date | Section(s) revised  | Description of revision(s)                                                                       |
|------------------|---------------|---------------------|--------------------------------------------------------------------------------------------------|
|                  |               | Protocol 9.1.3.1    | Changed Appendix numbering.                                                                      |
|                  |               | Protocol 9.1.3.2    | Changed Appendix numbering.                                                                      |
|                  |               | Protocol 9.1.4      | Clarified confidentiality of participants in group settings.                                     |
|                  |               | Protocol 9.3.1      | Deleted “routine.”                                                                               |
|                  |               | Protocol Table 1    | Deleted Joggle. Added PCL-C to screener.                                                         |
|                  |               | Protocol Table 3    | Added NVivo 9 citation.                                                                          |
|                  |               | Protocol References | Added References from protocol section 6.2.3.10.                                                 |
|                  |               | Appendix 1          | Added PCL-C to screening.                                                                        |
|                  |               | Appendix 3          | Language clarifications. Revised questions 4 and 10. Added PCL-C.                                |
|                  |               | Appendix 10         | Language clarifications.                                                                         |
|                  |               | Appendix 17         | Deleted; Joggle items.                                                                           |
|                  |               | Appendix 18         | Re-numbered to Appendix 17.                                                                      |
|                  |               | Appendix 19         | Re-numbered to Appendix 18.                                                                      |
|                  |               | Appendix 20-1       | Re-numbered to Appendix 19-1.                                                                    |
|                  |               | Appendix 20-2       | Re-numbered to Appendix 19-2. Updated dates.                                                     |
|                  |               | Appendix 20-3       | Re-numbered to Appendix 19-3.                                                                    |
|                  |               | Appendix 20-4       | Clarifications. Re-numbered to Appendix 19-4.                                                    |
|                  |               | Appendix 20-5       | Re-numbered to Appendix 19-5.                                                                    |
|                  |               | Appendix 20-6       | Re-numbered to Appendix 19-6.                                                                    |
|                  |               | Appendix 20-7       | Re-numbered to Appendix 19-7.                                                                    |
|                  |               | Appendix 20-8       | Re-numbered to Appendix 19-8.                                                                    |
|                  |               | Appendix 20-9       | Re-numbered to Appendix 19-9.                                                                    |
|                  |               | Appendix 20-10      | Re-numbered to Appendix 19-10.                                                                   |
|                  |               | Appendix 20-11      | Re-numbered to Appendix 19-11.                                                                   |
|                  |               | Appendix 21-1       | Language clarifications. Deleted Joggle text. Simplified language. Re-numbered to Appendix 20-1. |
|                  |               | Appendix 21-2       | Provided contact number. Re-numbered to Appendix 20-2.                                           |
|                  |               | Appendix 21-3       | Provided contact number. Re-numbered to Appendix 20-3.                                           |

| Protocol version | Protocol Date | Section(s) revised                                    | Description of revision(s)                                                            |
|------------------|---------------|-------------------------------------------------------|---------------------------------------------------------------------------------------|
|                  |               |                                                       |                                                                                       |
|                  |               | Appendix 21-4                                         | Provided contact number. Re-numbered to Appendix 20-4.                                |
|                  |               | Appendix 21-5                                         | Re-numbered to Appendix 20-5.                                                         |
|                  |               | HIPAA Waiver                                          | Clarified intent of waiver.                                                           |
|                  |               | Addendum Section 2 (Effectiveness Trial Recruitment)  | Described recruitment strategy.                                                       |
|                  |               | Addendum Section 2 (Acceptability Study Recruitment)  | Described recruitment strategy and group assignment. Revised Spouse Dyad eligibility. |
|                  |               | Addendum Section 3 (Consenting for Initial Screening) | Described consenting process for initial effectiveness study screening.               |
|                  |               | Addendum Section 3 (Effectiveness Trial Consenting)   | Described consenting process for effectiveness trial.                                 |
|                  |               | Addendum Section 3 (Acceptability Study Consenting)   | Described consenting process for acceptability study.                                 |
|                  |               | Addendum Section 4                                    | Clarified need for participant referral.                                              |
|                  |               | Addendum Section 6                                    | Clarified terms of records retention.                                                 |
|                  |               | Addendum Section 8                                    | Clarified standard behavioral health care requirements.                               |
|                  |               |                                                       |                                                                                       |

11

|                  |                |                                                                                                                                       |
|------------------|----------------|---------------------------------------------------------------------------------------------------------------------------------------|
| Amendment 2      | Protocol 4.1.3 | Deleted pre-existing Horner's syndrome as study exclusion criterion.                                                                  |
| October 23, 2015 | Protocol 6.2.1 | Deleted pre-existing Horner's syndrome as study exclusion criterion. Clarified role of clinician in determining whether an individual |

|  |                     |                                                                                                                                                                                                            |
|--|---------------------|------------------------------------------------------------------------------------------------------------------------------------------------------------------------------------------------------------|
|  |                     | with pre-existing Horner’s syndrome should be excluded from the study.                                                                                                                                     |
|  | Protocol 6.4.13     | Text addition regarding participant messaging when suicidal ideation is identified during online assessments.                                                                                              |
|  | Protocol 7.2        | Text addition to address potential risk to subjects in the event that they learn they were randomized to sham.                                                                                             |
|  | Protocol 9.1.3      | Text addition regarding suicidal/homicidal ideation and command notification.                                                                                                                              |
|  | Protocol References | Deleted references associated with Joggle.                                                                                                                                                                 |
|  | Appendix 1          | Deleted Joggle.                                                                                                                                                                                            |
|  | Appendix 2          | Text revisions regarding diagnosis of PTSD and additions regarding eligibility for gift cards. Clarification that those deemed ineligible for the study may still be able to get an SGB outside the study. |
|  | Appendix 19-1       | Text revisions.                                                                                                                                                                                            |
|  | Appendix 19-3       | Text revisions.                                                                                                                                                                                            |
|  | Appendix 19-6       | Text revisions.                                                                                                                                                                                            |
|  | Appendix 20-1       | Text revisions re: AHLTA and beneficiaries. Addition of text regarding the assigning of “quarters” following procedures.                                                                                   |
|  |                     |                                                                                                                                                                                                            |

12

|                                      |                                      |                                                                                           |
|--------------------------------------|--------------------------------------|-------------------------------------------------------------------------------------------|
| Amendment 3<br><br>November 19, 2015 | Protocol Additional Co-Investigators | Text revision.                                                                            |
|                                      | Protocol Synopsis                    | Text additions and revisions.                                                             |
|                                      | Protocol 4.1.3                       | Text revision.                                                                            |
|                                      | Protocol 4.2.2                       | Text revision.                                                                            |
|                                      | Protocol 6.1                         | Text revision.                                                                            |
|                                      | Protocol 6.2.2                       | Text revision.                                                                            |
|                                      | Protocol 9.1.3                       | Highlighted text addition regarding suicidal/homicidal ideation and command notification. |
|                                      | Appendix 2                           | Text revisions, primarily to clarify the remote consent and screening process.            |
|                                      | Appendix 19-1                        | Text revision.                                                                            |
|                                      | Appendix 19-3                        | Text addition.                                                                            |

|                                 |                                           |                                                                                                         |
|---------------------------------|-------------------------------------------|---------------------------------------------------------------------------------------------------------|
|                                 | Appendix 19-4                             | Text addition.                                                                                          |
|                                 | Appendix 19-5                             | Text addition.                                                                                          |
|                                 | Appendix 19-6                             | Text addition.                                                                                          |
|                                 | Appendix 20-1                             | Text additions to clarify that no diagnosis of PTSD will be placed in the participant's medical record. |
|                                 | Appendix 20-3                             | Text revision.                                                                                          |
|                                 | Appendix 20-4                             | Text additions.                                                                                         |
|                                 | Appendix 20-5                             | Text revisions.                                                                                         |
|                                 | Commander Letter                          | Text revision.                                                                                          |
|                                 | WAMC Addendum                             | Personnel addition and text revision.                                                                   |
| Amendment 4<br>December 1, 2015 | Protocol 6.5.1.2                          | Text revisions.                                                                                         |
|                                 | Appendix 10                               | Text deletions regarding scenario 5.                                                                    |
|                                 | WAMC Addendum                             | Text revision.                                                                                          |
| Amendment 5<br>January 8, 2016  | Protocol 7.1, 7.2, 7.4, 7.6, 7.7          | Revisions regarding HRPO reporting requirements; deletion of text regarding HSRRB.                      |
|                                 | Protocol 7.10                             | Text additions summarizing HRPO reporting requirements.                                                 |
|                                 | Protocol 9.1.2                            | Deletion of text regarding HSRRB.                                                                       |
|                                 | Appendix 18                               | Text revisions.                                                                                         |
|                                 | Appendix 20-1                             | Text revisions.                                                                                         |
|                                 |                                           |                                                                                                         |
| Amendment 6<br>March 23, 2016   | Protocol 3.1                              | Text revision.                                                                                          |
|                                 | Protocol 6.2.1                            | Text revisions.                                                                                         |
|                                 | Protocol 6.2.3                            | Text revision.                                                                                          |
|                                 | Protocol 6.4.13                           | Text deletion.                                                                                          |
|                                 | Protocol 6.5.1.1                          | Text revision.                                                                                          |
|                                 | Protocol 7.1, 7.2, 7.4, 7.6.1, 7.6.3, 7.7 | Text revisions and additions per HRPO specification.                                                    |
|                                 | Protocol 7.5                              | Text deletion.                                                                                          |
|                                 | Protocol 7.10                             | Text additions per HRPO specification.                                                                  |
|                                 | Protocol 9.1.2                            | Text deletion per HRPO specification.                                                                   |
|                                 | Appendix 2                                | Text addition.                                                                                          |
|                                 | Appendix 18                               | Text addition regarding the importance of not                                                           |

|                                              |                               |                                                                                                         |
|----------------------------------------------|-------------------------------|---------------------------------------------------------------------------------------------------------|
|                                              |                               | discussing information about the study with other service members.                                      |
|                                              | Appendix 19-1                 | Text revisions.                                                                                         |
|                                              | Appendix 20-1                 | Text addition elaborating on request that study participants not discuss study information with others. |
| Amendment 7<br><br>July 21, 2016             | Protocol Study Locations Page | Text addition.                                                                                          |
|                                              | Protocol Table of Contents    | Added Appendix 19-12. Qualitative Study Telephone Script and Reminder Emails.                           |
|                                              | Protocol 6.5.1.1              | Text addition regarding Appendix 19-12.                                                                 |
|                                              | Appendix 9                    | Text additions.                                                                                         |
|                                              | Appendix 19-12                | Added.                                                                                                  |
|                                              | WAMC Site Specific Addendum   | Text additions.                                                                                         |
| Amendment 8 (Disapproved)<br>August 25, 2016 | Protocol 6.1                  | Text addition.                                                                                          |
| Renumbering of Amendments<br>Beginning Below |                               |                                                                                                         |
| Amendment 12<br>August 29, 2016              | Protocol Synopsis             | Replaced CAPS eligibility criterion with PCL-C criterion.                                               |
|                                              | Table 1                       | Clarification.                                                                                          |
|                                              | Protocol 4.1.2                | Replaced CAPS eligibility criterion with PCL-C criterion.                                               |
|                                              | Protocol 4.1.3                | Removed concurrent psychological treatment from exclusion criteria; removed PCL-C.                      |
|                                              | Protocol 6.2.1                | Corrected CAPS text.                                                                                    |
|                                              | Protocol 6.2.2                | Removed CAPS eligibility, corrected text.                                                               |
|                                              | Protocol 6.2.2.3              | Corrected text.                                                                                         |
|                                              | Protocol 6.2.3.3              | Added PCL-C as eligibility criterion.                                                                   |
|                                              |                               |                                                                                                         |
| Amendment 13 (LRMC)<br>August 12, 2016       | WAMC Site Specific Addendum   | Text revisions.                                                                                         |
| Amendment 14<br>October 11, 2016             | Protocol Study Locations      | Text revisions.                                                                                         |
|                                              | WAMC Site Specific Addendum   | Text additions regarding recruitment activities and revisions.                                          |



|                                   |                                   |                                                                                                                                                      |
|-----------------------------------|-----------------------------------|------------------------------------------------------------------------------------------------------------------------------------------------------|
|                                   | Study Poster                      | Text revisions.                                                                                                                                      |
| Amendment 15                      | Protocol Deviation                | WAMC                                                                                                                                                 |
| Amendment 16<br>November 29, 2016 | LPMC Site Specific Addendum       | Text revisions regarding the expansion of Dr. Ryan Young's role and recruitment activities                                                           |
|                                   | TAMC Site Specific Addendum       | Text revisions regarding the expansion of Dr. Cuong Nguyen's role and recruitment activities                                                         |
| Amendment 17<br>January 23, 2017  |                                   | Amendment retracted                                                                                                                                  |
| Amendment 18<br>March 24, 2017    | LPMC Site Specific Addendum       | Text revisions regarding coordinator personnel change at LPMC                                                                                        |
| Amendment 19<br>April 12, 2017    | Protocol Additional Investigators | Deletion of COL James Lynch as Co-Investigator                                                                                                       |
|                                   | Protocol 6.1                      | Text deletion regarding PTSD diagnosis; text additions regarding recruitment activities, role of the PI, use of POAs and mass e-mail for recruitment |
|                                   | Appendix 2                        | Text addition of recruitment e-mails                                                                                                                 |
|                                   | Appendix 19-1                     | Text addition of study closeout and thank you e-mail                                                                                                 |
|                                   | Appendix 19-2                     | Text revisions.                                                                                                                                      |
|                                   | LPMC Site Specific Addendum       | Text deletion regarding PTSD diagnosis; text additions regarding recruitment activities, role of the PI, use of POAs and mass e-mail for recruitment |
|                                   | TAMC Site Specific Addendum       | Text deletion regarding PTSD diagnosis; text additions regarding recruitment activities, role of the PI, use of POAs and mass e-mail for recruitment |
| Amendment 20<br>June 9, 2017      | WAMC Site Specific Addendum       | Text deletion regarding PTSD diagnosis; text additions regarding recruitment activities, role of the PI, use of POAs and mass e-mail for recruitment |
|                                   | Study video                       | Addition of study video                                                                                                                              |
| Amendment 21<br>August 4, 2017    | Protocol Study Locations          | Personnel title updates.                                                                                                                             |
|                                   | Protocol Additional Co-           | Personnel information updates.                                                                                                                       |

|                   |                                                                                   |
|-------------------|-----------------------------------------------------------------------------------|
| Investigators     |                                                                                   |
| Protocol Synopsis | Text revision to acceptability study design to broaden participant pool.          |
| Protocol 2.2      | Text revision to broaden participant pool.                                        |
| Protocol 3.1      | Text revision to allow electronic or physical gift cards.                         |
| Protocol 3.2      | Text revision to acceptability study design to broaden participant pool.          |
| Protocol 4.1.1    | Text deletion to remove site enrollment limitation.                               |
| Protocol 4.2.1    | Text deletion to remove site enrollment limitation.                               |
| Protocol 4.2.2    | Text revision to broaden participant pool.                                        |
| Protocol 4.2.3    | Text clarification.                                                               |
| Protocol 6.1      | Text deletion to remove site enrollment limitation.                               |
| Protocol 6.4      | Text deletion regarding in-person follow-up visits.                               |
| Protocol 6.5.1.1  | Text addition of new acceptability study recruitment methods; text clarification. |
| Protocol 6.5.1.2  | Text clarification.                                                               |
| Protocol 6.5.1.3  | Text revision to broaden participant pool.                                        |
| Appendix 19-1     | Addition of KRO and RVP.                                                          |
| Appendix 19-3     | Text clarification and addition to broaden participant pool.                      |
| Appendix 19-4     | Text clarification and revision to broaden participant pool.                      |
| Appendix 19-5     | Text clarification and revision to broaden participant pool.                      |
| Appendix 19-6     | Text revision to broaden participant pool.                                        |
| Appendix 19-7     | Text revision to broaden participant pool.                                        |
| Appendix 19-8     | Text revision to broaden participant pool.                                        |
| Appendix 19-9     | Text revision to broaden participant pool.                                        |
| Appendix 19-10    | Text revision to broaden participant pool.                                        |
| Appendix 19-11    | Text correction and revision to broaden participant pool.                         |
| Appendix 19-12    | Text revision regarding gift card and addition to broaden participant pool.       |
| Appendix 20-1     | Increased checkbox size.                                                          |
| Appendix 20-2     | Text clarification and addition.                                                  |

|                                                             |                             |                                                                                                                            |
|-------------------------------------------------------------|-----------------------------|----------------------------------------------------------------------------------------------------------------------------|
|                                                             | Appendix 20-3               | Text clarification and addition.                                                                                           |
|                                                             | Appendix 20-4               | Text clarification and addition.                                                                                           |
|                                                             | Appendix 20-5               | Text clarification and addition.                                                                                           |
|                                                             | HIPAA Waivers               | Text revision and addition for acceptability study recruitment.                                                            |
|                                                             | LPMC Site Specific Addendum | Removal of site enrollment limitation, inclusion of AFN for recruitment, and addition for acceptability study recruitment. |
|                                                             | TAMC Site Specific Addendum | Personnel information update, removal of site enrollment limitation and addition for acceptability study recruitment.      |
|                                                             | WAMC Site Specific Addendum | Personnel information update, removal of site enrollment limitation, and addition for acceptability study recruitment.     |
|                                                             | Data collection form        | Addition of data collection form for acceptability study recruitment.                                                      |
|                                                             | Provider Fact sheet         | Addition of a provider fact sheet as recruitment material to answer common questions.                                      |
|                                                             | Patient Fact sheet          | Addition of a patient fact sheet as recruitment material to answer common questions.                                       |
|                                                             | Radio ad text               | Addition of text for an AFN radio advertisement.                                                                           |
| Amendment 22<br>August 2017                                 | Continuing Review           |                                                                                                                            |
| Amendment 23<br>September 22, 2017                          | Protocol 6.1                | Addition of text regarding Facebook page and advertising for recruitment                                                   |
|                                                             | LPMC Site Specific Addendum | Addition of text regarding Facebook page and advertising for recruitment                                                   |
|                                                             | TAMC Site Specific Addendum | Addition of text regarding Facebook page and advertising for recruitment                                                   |
|                                                             | WAMC Site Specific Addendum | Addition of text regarding Facebook page and advertising for recruitment                                                   |
|                                                             | Facebook ad                 | Addition of Facebook advertisement                                                                                         |
|                                                             | AFN TV ad                   | Addition of AFN TV advertisement                                                                                           |
| Amendment 2.0 (numbering restarts in eIRB)<br>March 3, 2018 | Throughout protocol         | Revise CAPS change from 15 to 10<br>Clarification of enrollment estimates                                                  |
|                                                             | Protocol 8.3                | Justification for CAPS change from 15 to 10                                                                                |

---

|  |             |                        |
|--|-------------|------------------------|
|  | Protocol 10 | Addition of references |
|--|-------------|------------------------|

13  
14  
15  
16  
17

18  
19  
  
20  
21  
22  
23  
24  
25  
26  
27  
28  
29  
30  
31  
32  
33  
34  
35  
36  
37  
38  
39  
40  
41  
42  
43  
44  
45  
46

**STUDY LOCATIONS**

Womack Army Medical Center (WAMC)  
4-2817 Reilly Street  
Fort Bragg NC 28310  
Site PI/Co-Investigator: Michael Bartoszek, MD  
Chief Anesthesiologist, Department of Anesthesia  
Co-Investigator: Anthony Plunkett, MD  
Consultant: COL Marla R. Hemphill, MD  
Federalwide/DOD Assurance #: 00012834

Tripler Army Medical Center (TAMC)  
1 Jarrett White Road  
Honolulu HI 96859  
Site PI/Co-Investigator: LTC Brian McLean, MD  
Co-Investigator: Cuong Nguyen, MD  
Federalwide/DOD Assurance #: 00003575

Landstuhl Regional Medical Center (LRMC)  
Geb. 3765  
66849 Landstuhl, Germany  
Site PI/Co-Investigator: MAJ Ali Turabi, MD  
Co-Investigator: Octav Constantinescu, MD  
Co-Investigator: Ryan Young, MD  
Federalwide/DOD Assurance #: 00019005

47

**ADDITIONAL CO-INVESTIGATORS**

48

COL Shawn F. Kane, MD, FAAFP, FACSM

49

U.S. Army Special Operations Command

50

Commander, Special Warfare Medical Group (Airborne)

51

USAJFK SWCS

52

ATTN: AOJK-MED

53

3004 Ardennes St, Stop A

54

Ft Bragg NC 28310

55

56

LTC Eugene Kim, MD

57

Chief, Specialty Behavioral Health

58

Womack Army Medical Center

59

4-2817 Reilly Street

60

Fort Bragg NC 28310

61

62

63

64

COL Sean Mulvaney, MD

65

Consortium for Health and Military Performance

66

Uniformed Services University, 4201 Jones Bridge Road

67

Bethesda, MD 20814

68

69

70

71

72  
73  
74  
75  
76  
77  
78  
79  
80  
81  
82  
83  
84  
85  
86  
87  
88  
89  
90  
91  
92  
93  
94  
95  
96  
97  
98  
99  
100  
101

**INVESTIGATOR’S AGREEMENT AND SIGNATURE PAGE**

**Efficacy and Patient Acceptability of Stellate Ganglion Block for Treatment of PTSD Symptoms**

**Protocol Issue Date:**

I have read the protocol and agree:

- That the protocol contains all necessary details for carrying out the study and that I will complete the study within the time designated by RTI International.
- To assume responsibility for the proper conduct of the study according to the protocol and any other study-conduct procedures and requirements provided by RTI International.
- To read, understand, and provide the protocol to all physicians, nurses, and other study personnel accountable to me and participating in the conduct of this study.
- To ensure that all study personnel assisting me with the study are fully informed of their study-related duties and responsibilities as described in the protocol and other procedures/requirements provided by RTI International.
- That the participants will be under my personal supervision or under the supervision of an investigator responsible to me.
- Not to implement or initiate the study or make any changes to the protocol without agreement from RTI International and prior submission to and written approval from the institutional review board (IRB), except when necessary to eliminate the immediate hazard to the participants, or for administrative aspects of the study (where permitted by all applicable regulatory requirements).
- To comply with all applicable regulatory requirements in the conduct and reporting of the study.
- To keep the conduct and results of this study confidential until it and all study analyses are complete.
- That RTI International and its designees shall have access to any source documents from which Case Report Form data have been collected.

\_\_\_\_\_

Principal Investigator’s Signature

Date

\_\_\_\_\_

Principal Investigator’s Printed Name

Site

|     |                          |                                                                                                                |    |
|-----|--------------------------|----------------------------------------------------------------------------------------------------------------|----|
| 102 | <b>TABLE OF CONTENTS</b> |                                                                                                                |    |
| 103 | 1.                       | INTRODUCTION .....                                                                                             | 24 |
| 104 | 1.1.                     | Background .....                                                                                               | 24 |
| 105 | 1.1.1.                   | PTSD .....                                                                                                     | 24 |
| 106 | 1.1.2.                   | PTSD Treatment .....                                                                                           | 24 |
| 107 | 1.1.3.                   | Stellate Ganglion Block .....                                                                                  | 25 |
| 108 | 1.1.4.                   | Theoretical Models .....                                                                                       | 26 |
| 109 | 1.2.                     | Rationale for the Current Study .....                                                                          | 27 |
| 110 | 2.                       | OBJECTIVES .....                                                                                               | 29 |
| 111 | 2.1.                     | Clinical Effectiveness Trial .....                                                                             | 29 |
| 112 | 2.2.                     | Acceptability Study .....                                                                                      | 29 |
| 113 | 3.                       | STUDY DESIGN .....                                                                                             | 30 |
| 114 | 3.1.                     | Clinical Effectiveness Trial Treatment Plan and Regimen .....                                                  | 30 |
| 115 | 3.2.                     | Acceptability Study Design .....                                                                               | 32 |
| 116 | 4.                       | PARTICIPANT POPULATION .....                                                                                   | 34 |
| 117 | 4.1.                     | Clinical Effectiveness Trial .....                                                                             | 34 |
| 118 | 4.1.1.                   | Number of Participants .....                                                                                   | 34 |
| 119 | 4.1.2.                   | Inclusion Criteria .....                                                                                       | 34 |
| 120 | 4.1.3.                   | Exclusion Criteria .....                                                                                       | 34 |
| 121 | 4.2.                     | Acceptability Study .....                                                                                      | 35 |
| 122 | 4.2.1.                   | Number of Participants .....                                                                                   | 35 |
| 123 | 4.2.2.                   | Inclusion Criteria .....                                                                                       | 36 |
| 124 | 4.2.3.                   | Exclusion Criteria .....                                                                                       | 36 |
| 125 | 5.                       | STUDY DRUGS .....                                                                                              | 37 |
| 126 | 5.1.                     | Randomization and Blinding .....                                                                               | 37 |
| 127 | 5.2.                     | Description and Handling of Study Drug .....                                                                   | 37 |
| 128 | 5.2.1.                   | Formulation .....                                                                                              | 37 |
| 129 | 5.2.2.                   | Packaging and Labeling .....                                                                                   | 37 |
| 130 | 5.2.3.                   | Storage and Handling .....                                                                                     | 37 |
| 131 | 5.3.                     | Dosage and Administration of Study Drug .....                                                                  | 37 |
| 132 | 6.                       | STUDY PROCEDURES (APPENDIX 1) .....                                                                            | 38 |
| 133 | 6.1.                     | Participant Enrollment and Treatment Assignment .....                                                          | 38 |
| 134 | 6.2.                     | Pre-Treatment Assessments .....                                                                                | 39 |
| 135 | 6.2.1.                   | Screening Visit .....                                                                                          | 39 |
| 136 | 6.2.2.                   | Clinician-Administered PTSD Scale for DSM-5 (CAPS-5; Appendix 9) .....                                         | 40 |
| 137 | 6.2.2.1.                 | CAPS-5 Administration .....                                                                                    | 41 |
| 138 | 6.2.2.2.                 | Field Preparations: Clinical Interviewer Recruiting and Training .....                                         | 41 |
| 139 | 6.2.2.3.                 | Clinical Quality Control .....                                                                                 | 41 |
| 140 | 6.2.2.4.                 | Managing Distressed Respondents During CAPS-5 Administration .....                                             | 41 |
| 141 | 6.2.3.                   | Baseline Assessments (Week 0, immediately before SGB) .....                                                    | 42 |
| 142 | 6.2.3.1.                 | Urine Pregnancy Test for Females of Child-bearing Potential .....                                              | 42 |
| 143 | 6.2.3.2.                 | PTSD Checklist for DSM-5 (PCL-5; <b>Appendix 5</b> ) .....                                                     | 42 |
| 144 | 6.2.3.3.                 | PTSD Checklist - Civilian Version (PCL-C; <b>Appendix 6</b> ) .....                                            | 43 |
| 145 | 6.2.3.4.                 | Mini-International Neuropsychiatric Interview (M.I.N.I.)-Plus Suicidality Items<br>( <b>Appendix 7</b> ) ..... | 43 |
| 146 | 6.2.3.5.                 | AUDIT-C/AUDIT ( <b>Appendix 8</b> ) .....                                                                      | 43 |
| 147 | 6.2.3.6.                 | K6 ( <b>Appendix 11</b> ) .....                                                                                | 44 |
| 148 | 6.2.3.7.                 | PHQ-9 ( <b>Appendix 12</b> ) .....                                                                             | 44 |
| 149 |                          |                                                                                                                |    |



|     |           |                                                                                                                      |    |
|-----|-----------|----------------------------------------------------------------------------------------------------------------------|----|
| 150 | 6.2.3.8.  | GAD-7 ( <b>Appendix 13</b> ).....                                                                                    | 44 |
| 151 | 6.2.3.9.  | SF-12 (Version 2.0) ( <b>Appendix 14</b> ).....                                                                      | 44 |
| 152 | 6.2.3.10. | Short pain scale ( <b>Appendix 15</b> ).....                                                                         | 44 |
| 153 | 6.2.3.11. | Current Medications ( <b>Appendix 16</b> ).....                                                                      | 45 |
| 154 | 6.2.3.12. | Other Questions ( <b>Appendix 17</b> ).....                                                                          | 45 |
| 155 | 6.3.      | Treatment and Treatment Assessments (Weeks 0 and 2).....                                                             | 45 |
| 156 | 6.4.      | Post-Treatment Assessments (Weeks 4, 6, and 8).....                                                                  | 46 |
| 157 | 6.4.1.    | CAPS-5.....                                                                                                          | 46 |
| 158 | 6.4.2.    | PCL-5.....                                                                                                           | 47 |
| 159 | 6.4.3.    | PCL-C.....                                                                                                           | 47 |
| 160 | 6.4.4.    | M.I.N.I.-Plus Suicidality Items.....                                                                                 | 47 |
| 161 | 6.4.5.    | AUDIT-C/AUDIT.....                                                                                                   | 47 |
| 162 | 6.4.6.    | K6.....                                                                                                              | 47 |
| 163 | 6.4.7.    | PHQ-9.....                                                                                                           | 47 |
| 164 | 6.4.8.    | GAD-7.....                                                                                                           | 47 |
| 165 | 6.4.9.    | SF-12.....                                                                                                           | 47 |
| 166 | 6.4.10.   | Short Pain Scale.....                                                                                                | 47 |
| 167 | 6.4.11.   | Current Medications.....                                                                                             | 47 |
| 168 | 6.4.12.   | Additional Questions.....                                                                                            | 47 |
| 169 | 6.4.13.   | Managing Distressed Participants during Automated Assessments.....                                                   | 48 |
| 170 | 6.5.      | Acceptability Study Procedures.....                                                                                  | 48 |
| 171 | 6.5.1.    | Participant Recruitment and Group Assignment.....                                                                    | 48 |
| 172 | 6.5.1.1.  | Service Members.....                                                                                                 | 48 |
| 173 | 6.5.1.2.  | Service Member/Spouse Dyads.....                                                                                     | 50 |
| 174 | 6.5.1.3.  | Providers.....                                                                                                       | 50 |
| 175 | 6.5.2.    | Data Collection.....                                                                                                 | 50 |
| 176 | 6.5.3.    | Managing Distressed Participants During Data Collection.....                                                         | 51 |
| 177 | 6.6.      | Assessments for Premature Discontinuation from Study.....                                                            | 52 |
| 178 | 6.7.      | Criteria for Suspension of Study Treatment.....                                                                      | 52 |
| 179 | 7.        | ADVERSE EVENTS AND DEVIATION MANAGEMENT.....                                                                         | 53 |
| 180 | 7.1.      | Research Monitor.....                                                                                                | 53 |
| 181 | 7.2.      | Adverse Events.....                                                                                                  | 53 |
| 182 | 7.3.      | Assessment of Adverse Events.....                                                                                    | 54 |
| 183 | 7.4.      | Adverse Event Reporting Requirements.....                                                                            | 55 |
| 184 | 7.5.      | Serious Adverse Events.....                                                                                          | 55 |
| 185 | 7.6.      | Serious Adverse Event Reporting Requirements.....                                                                    | 56 |
| 186 | 7.6.1.    | All Serious Adverse Events.....                                                                                      | 56 |
| 187 | 7.6.2.    | Investigator Reporting Requirements for SAEs.....                                                                    | 57 |
| 188 | 7.6.3.    | Post Study Reporting Requirements.....                                                                               | 58 |
| 189 | 7.7.      | Protocol Deviation Reporting Requirements.....                                                                       | 58 |
| 190 | 7.8.      | Clinical Laboratory Abnormalities and Other Abnormal Assessments as Adverse Events or<br>Serious Adverse Events..... | 58 |
| 192 | 7.9.      | Risks for Women of Childbearing Potential or during Pregnancy.....                                                   | 58 |
| 193 | 7.10.     | HRPO Reporting Requirements.....                                                                                     | 59 |
| 194 | 8.        | STATISTICAL CONSIDERATIONS.....                                                                                      | 60 |
| 195 | 8.1.      | Primary Analysis.....                                                                                                | 60 |
| 196 | 8.2.      | Secondary Analysis.....                                                                                              | 60 |
| 197 | 8.3.      | Power and Sample Size.....                                                                                           | 61 |
| 198 | 8.4.      | Attrition.....                                                                                                       | 61 |
| 199 | 9.        | RESPONSIBILITIES.....                                                                                                | 63 |
| 200 | 9.1.      | Investigator Responsibilities.....                                                                                   | 63 |

---

|     |          |                                                         |    |
|-----|----------|---------------------------------------------------------|----|
| 201 | 9.1.1.   | Good Clinical Practice.....                             | 63 |
| 202 | 9.1.2.   | Institutional Review Board (IRB) Approval .....         | 63 |
| 203 | 9.1.3.   | Informed Consent .....                                  | 63 |
| 204 | 9.1.3.1. | Effectiveness Clinical Trial .....                      | 63 |
| 205 | 9.1.3.2. | Acceptability Study .....                               | 64 |
| 206 | 9.1.4.   | Confidentiality.....                                    | 64 |
| 207 | 9.1.5.   | Case Report Forms .....                                 | 65 |
| 208 | 9.1.6.   | Drug Accountability .....                               | 65 |
| 209 | 9.1.7.   | Inspections.....                                        | 66 |
| 210 | 9.1.8.   | Protocol Compliance .....                               | 66 |
| 211 | 9.2.     | Sponsor Responsibilities .....                          | 66 |
| 212 | 9.2.1.   | Protocol Modifications .....                            | 66 |
| 213 | 9.2.2.   | Study Report and Publications .....                     | 66 |
| 214 | 9.3.     | Joint Investigator/Sponsor Responsibilities .....       | 67 |
| 215 | 9.3.1.   | Access to Information for Monitoring.....               | 67 |
| 216 | 9.3.2.   | Access to Information for Auditing or Inspections ..... | 67 |
| 217 | 9.3.3.   | Study Discontinuation .....                             | 67 |
| 218 | 10.      | REFERENCES .....                                        | 68 |
| 219 |          |                                                         |    |

220

### LIST OF IN-TEXT TABLES

|     |          |                                                       |    |
|-----|----------|-------------------------------------------------------|----|
| 221 | Table 1. | Assessment Schedule .....                             | 31 |
| 222 | Table 2. | Number of Participants in Qualitative Study.....      | 35 |
| 223 | Table 3. | Topics Addressed in Focus Groups and Interviews ..... | 51 |
| 224 |          |                                                       |    |
| 225 |          |                                                       |    |

226

## PROTOCOL SYNOPSIS

227

**RTI International**

228

**3040 E. Cornwallis Road**

229

**Research Triangle Park NC 27709**

230

231

---

**Title of Study:** A Randomized, Sham-procedure-controlled, Blinded Study to Evaluate the Effectiveness and Acceptability of Right-sided Stellate Ganglion Block for Treatment of Posttraumatic Stress Disorder Symptoms

---

**IND Number:** This is a non-IND study.

**EudraCT Number:** This is a non-EU study

---

**Study Centers Planned:** 2 centers in USA  
1 center in Germany

---

**Effectiveness Objectives:** The primary objective of the clinical effectiveness trial is as follows:

- to evaluate whether right-sided stellate ganglion block (SGB) performed at 0 and 2 weeks will result in a 10 point decrease in the mean Clinician Administered PTSD Scale for DSM-5 (CAPS-5) total symptom scores between baseline and 8 weeks

The secondary objectives of the clinical effectiveness trial are as follows:

- to evaluate whether right-sided SGB performed at 0 and 2 weeks will improve PTSD symptoms as reflected by corresponding PTSD Checklist for DSM-5 (PCL-5) items between baseline and 8 weeks
- to explore the association between the main outcome and other potential confounding variables (e.g., concomitant medications, duration of Posttraumatic Stress Disorder [PTSD], post-block Horner's syndrome, etc.)
- to evaluate whether right-sided SGB performed at 0 and 2 weeks will reduce distress (K6), suicidality (M.I.N.I.-Plus Suicidality), anxiety (GAD-7), depression (PHQ-9), alcohol use (AUDIT-C/AUDIT), or pain (short pain scale) between baseline and 8 weeks
- to evaluate whether right-sided SGB at 0 and 2 weeks will improve physical and mental condition (SF-12) between baseline and 8 weeks

---

232

**PROTOCOL SYNOPSIS (CONTINUED)**

---

|                                                 |                                                                                                                                                                                                                                                                                                                                                                                                                                                                                                                                       |
|-------------------------------------------------|---------------------------------------------------------------------------------------------------------------------------------------------------------------------------------------------------------------------------------------------------------------------------------------------------------------------------------------------------------------------------------------------------------------------------------------------------------------------------------------------------------------------------------------|
| <b>Effectiveness Study Design:</b>              | Blinded, multi-center, randomized, sham-procedure-controlled                                                                                                                                                                                                                                                                                                                                                                                                                                                                          |
| <b>Number of Participants Planned:</b>          | 240                                                                                                                                                                                                                                                                                                                                                                                                                                                                                                                                   |
| <b>Target Population:</b>                       | active-duty service members                                                                                                                                                                                                                                                                                                                                                                                                                                                                                                           |
| <b>Duration of Study:</b>                       | 10 weeks                                                                                                                                                                                                                                                                                                                                                                                                                                                                                                                              |
| <b>Diagnosis and Main Eligibility Criteria:</b> | Participants with PCL-C score of 32 or higher<br>All participants must have anticipated assignment to installation for at least 2 months and have been offered an A-level modality PTSD treatment (see section 4.1.2 for definition)                                                                                                                                                                                                                                                                                                  |
| <b>Study Procedures/Frequency:</b>              | CAPS-5 following screening (prior to week 0) and at week 8<br>Stellate ganglion block at weeks 0 and 2<br>PCL-5 and PCL-C at weeks 0, 2, 4, 6, and 8<br>M.I.N.I.-Plus Suicidality Items at screening and weeks 0, 2, 4, 6, and 8<br>K6 Scale at weeks 0, 2, 4, 6, and 8<br>SF-12, GAD-7, PHQ-9, AUDIT-C/AUDIT, pain scale at weeks 0, 4, and 8                                                                                                                                                                                        |
| <b>Acceptability Objectives:</b>                | <ul style="list-style-type: none"> <li>• to assess participants’ perceptions of stellate ganglion block in relation to other PTSD treatment options</li> <li>• to inform communication with service members before, during, and after the procedure</li> </ul>                                                                                                                                                                                                                                                                        |
| <b>Acceptability Study Design:</b>              | Qualitative study using focus groups, small group interviews, and individual interviews (both in person and over the phone).                                                                                                                                                                                                                                                                                                                                                                                                          |
| <b>Number of Participants Planned:</b>          | 193                                                                                                                                                                                                                                                                                                                                                                                                                                                                                                                                   |
| <b>Target Population:</b>                       | <ul style="list-style-type: none"> <li>• participants in effectiveness clinical trial and their spouses</li> <li>• service members who have received SGB for PTSD symptoms at the participating study sites outside of the clinical trial and their spouse</li> <li>• providers who have referred or could potentially refer patients for SGB for PTSD symptoms at the study sites</li> <li>• clinicians who provide SGB for PTSD</li> </ul>                                                                                          |
| <b>Duration of Study:</b>                       | no individual’s participation will last more than 90 minutes                                                                                                                                                                                                                                                                                                                                                                                                                                                                          |
| <b>Main Eligibility Criteria:</b>               | <ul style="list-style-type: none"> <li>• participants in effectiveness clinical trial who received at least one intervention and initial follow-up within the prior three months</li> <li>• service members who have received at least one SGB for PTSD symptoms at the study sites within the prior three months</li> <li>• providers who have referred or could potentially refer service members for SGB for PTSD symptoms at the study sites</li> <li>• providers who perform SGB for PTSD symptoms at the study sites</li> </ul> |

---

235

**PROTOCOL SYNOPSIS (CONTINUED)**

---

**Test Product, Dose, and Mode of Administration:** 0.5% ropivacaine, 7-10 mL, under ultrasound visualization via needle ventral to right longus coli muscle (around and into the ventral fascia) and into the longus coli immediately dorsal to the presumed ventral fascia, at the level of the C6 anterior tubercle (landmarks for stellate ganglion)

---

**Reference Therapy, Dose, and Mode of Administration:** Preservative-free normal saline, 1-2 mL, under ultrasound visualization via needle anterolateral to right anterior tubercle of C6

---

**Study intervention:** Participants will be randomized 2:1 to either active (0.5% ropivacaine injection) or sham (normal saline injection).

---

**Primary outcome:** CAPS-5 total symptom score

---

**Criteria for Evaluation:**

**Safety:** adverse events

**Efficacy:** A 10 point decrease in mean CAPS-5 scores pre-treatment (prior to week 0) to 8 weeks post-treatment

**Acceptability:** service members' and providers' decision-making processes and information needs related to stellate ganglion block

---

**Statistical Methods:** Estimates of CAPS-5 total symptom score change between week 8 and pre-week 0 will be compared between the two treatment arms (active and sham) using a linear model that also accounts for study site, the initial (prior to week 0) CAPS-5 score, as well as potential confounding variables (e.g., concomitant medications, duration of PTSD, post-block Horner's syndrome, etc.) depending on availability. Output from the model will include adjusted point estimates of the average 8-week change in CAPS-5 symptom score for each treatment arm, the estimated average difference in the change between the two treatment arms, and corresponding 95% confidence intervals for each of these estimates, as well as a formal test of hypothesis of the difference in the scores between the two treatment arms.

We will analyze the effect of SGB on clinical criteria of PTSD as measured by the PCL-5 over time. We will assess differential treatment effects at weeks 2, 4, 6, and 8. The outcome variable in each model will be the binary outcome of diagnosis and the models will account for arm classification, week and study site; two-way and three-way interactions of treatment will also be included in the model.

Other secondary outcomes similarly will be assessed using linear mixed models or generalized models, as appropriate for the structure of the outcome measure.

---

236

237

238

239

240

All essential documents are being archived as required  
by the study contractual agreements or protocol.

241

## GLOSSARY OF ABBREVIATIONS AND DEFINITION OF TERMS

|         |                                                                                                            |
|---------|------------------------------------------------------------------------------------------------------------|
| AE      | adverse event                                                                                              |
| AHRQ    | Agency for Healthcare Research and Quality                                                                 |
| AUDIT   | Alcohol Use Disorders Identification Test                                                                  |
| AUDIT-C | Alcohol Use Disorders Identification Test Alcohol Consumption Questions                                    |
| BHP     | behavioral health provider                                                                                 |
| CAPS    | Clinician-Administered PTSD Scale                                                                          |
| CAPS-4  | Clinician-Administered PTSD Scale for DSM-IV                                                               |
| CAPS-5  | Clinician-Administered PTSD Scale for DSM-5                                                                |
| CBC     | complete blood count                                                                                       |
| CITI    | Collaborative Institutional Training Initiative                                                            |
| CRF     | Case Report Form(s)                                                                                        |
| CRO     | Contract Research Organization                                                                             |
| CRPS    | complex regional pain syndrome                                                                             |
| CS      | Clinical Supervisor                                                                                        |
| DOD     | Department of Defense                                                                                      |
| DRP     | Distressed Respondent Protocol                                                                             |
| DSM-5   | <i>Diagnostic and Statistical Manual of Mental Disorders</i> , Fifth Edition                               |
| DSMB    | Data and Safety Monitoring Board                                                                           |
| DSM-IV  | <i>Diagnostic and Statistical Manual of Mental Disorders</i> , Fourth Edition                              |
| ECG     | electrocardiogram                                                                                          |
| ED      | emergency department                                                                                       |
| EEG     | electroencephalogram                                                                                       |
| FDA     | (U.S.) Food and Drug Administration                                                                        |
| GAD-7   | Generalized Anxiety Disorder 7-item Scale                                                                  |
| GCP     | Good Clinical Practice (Guidelines)                                                                        |
| HCT     | hematocrit                                                                                                 |
| HGB     | hemoglobin                                                                                                 |
| HIPAA   | Health Insurance Portability and Accountability Act                                                        |
| HPA     | Human Protections Administrator                                                                            |
| HRB     | Survey of Health Related Behaviors among Active Duty Service Members                                       |
| HRPO    | USAMRMC Office of Research Protections Human Research Protections Office                                   |
| ICD-10  | International Statistical Classification of Diseases and Related Health Problems, 10 <sup>th</sup> edition |
| ICF     | <i>International Classification of Functioning, Disability and Health</i>                                  |
| ICH     | International Conference on Harmonisation                                                                  |
| ICH-GCP | International Conference on Harmonisation Good Clinical Practice                                           |
| ID      | identification                                                                                             |
| IEC     | Independent Ethics Committee                                                                               |
| IND     | investigational new drug                                                                                   |
| IOM     | Institute of Medicine                                                                                      |
| IRB     | Institutional Review Board                                                                                 |
| ITT     | intent-to-treat (population)                                                                               |
| IUD     | intrauterine device                                                                                        |
| IV      | intravenous                                                                                                |

242

243 **GLOSSARY OF ABBREVIATIONS AND DEFINITION OF TERMS (Continued)**

|         |                                                    |
|---------|----------------------------------------------------|
| JAMA    | <i>Journal of the American Medical Association</i> |
| K6      | Kessler Psychological Distress Scale               |
| LEC     | Life Events Checklist                              |
| LRMC    | Landstuhl Regional Medical Center                  |
| mL      | milliliter(s)                                      |
| MP      | Military Police                                    |
| MRI     | magnetic resonance imaging                         |
| NCS-R   | National Comorbidity Survey Replication            |
| NHIS    | U.S. National Health Interview Survey              |
| NSDUH   | National Survey on Drug Use and Health             |
| ORP     | USAMRMC Office of Research Protections             |
| PAPI    | paper-and-pencil interviewing                      |
| PCL-5   | PTSD Checklist for DSM-5                           |
| PCL-C   | PTSD Checklist - Civilian                          |
| PCL-M   | PTSD Checklist - Military                          |
| PE      | physical examination                               |
| PHI     | protected health information                       |
| PHQ     | Patient Health Questionnaire                       |
| PHQ-9   | Patient Health Questionnaire - 9                   |
| PTSD    | Posttraumatic Stress Disorder                      |
| PVN     | paraventricular nucleus of the thalamus            |
| RC      | Research Coordinator                               |
| RCT     | randomized, controlled trial                       |
| RSD     | reflex sympathetic dystrophy                       |
| SAE     | serious adverse event                              |
| SAP     | Statistical Analysis Plan                          |
| SF-12   | Short Form (12) Health Survey                      |
| SF-36   | Short Form (36) Health Survey                      |
| SG      | stellate ganglion                                  |
| SGB     | stellate ganglion block                            |
| SOP     | Standard Operating Procedure                       |
| SPN     | sympathetic preganglionic neuron                   |
| TAMC    | Tripler Army Medical Center                        |
| TBI     | traumatic brain injury                             |
| TV      | television                                         |
| UCMJ    | Uniform Code of Military Justice                   |
| ULN     | upper limit of the normal range                    |
| USAMRAA | US Army Medical Research Acquisition Activity      |
| USAMRMC | U.S. Army Medical Research and Materiel Command    |
| USASOC  | U.S. Army Special Operation Command                |
| VA      | Veterans Administration                            |
| WAMC    | Womack Army Medical Center                         |

## 244 **1. INTRODUCTION**

### 245 **1.1. Background**

#### 246 **1.1.1. PTSD**

247 Posttraumatic stress disorder (PTSD) is a reaction to a traumatic event in which an  
248 individual perceives threat of death or significant injury, resulting in acute fear that is  
249 experienced over an extended period of time following the event(s). According to the Diagnostic  
250 and Statistical Manual of Mental Disorders, Fifth Edition (DSM-5), symptoms are generally  
251 categorized in terms of intrusive symptoms (diagnostic criterion B), avoidance (diagnostic  
252 criterion C), negative alterations in cognitions and mood (diagnostic criterion D), and alterations  
253 in arousal and reactivity (diagnostic criterion E) (American Psychiatric Association, 2013).  
254 PTSD will develop in up to a third of individuals who are exposed to a significant stressor  
255 (Committee on Treatment of Posttraumatic Stress Disorder, Institute of Medicine, 2008), and  
256 approximately 10% to 20% of those diagnosed with PTSD will become chronic (Fletcher,  
257 Creamer, & Forbes, 2010). According to the 2000 National Comorbidity Survey Replication  
258 (NCS-R), an estimated 6.8% of adults in the United States will experience PTSD during their  
259 lifetime (Dohrenwend et al., 2006). Certain subgroups (e.g., military service members) are at an  
260 increased risk because of their higher likelihood of trauma exposure (Jonas et al., 2013). PTSD  
261 prevalence among active duty service members ranges from approximately 5% to 15%  
262 (Tanielian & Jaycox, 2008). Hoge and colleagues (2004) reported an estimated 12.9% of service  
263 members returning from combat operations in Iraq fit diagnostic criteria for PTSD.

264 There also is evidence that the prevalence of PTSD is increasing among service members.  
265 The 2008 Department of Defense Survey of Health Related Behaviors among Active Duty  
266 Service Members (HRB Survey) found that an estimated 11% met screening criteria for further  
267 evaluation of PTSD symptoms, up from 7% in 2005 (Bray et al., 2009). There also is a host of  
268 related sequelae, and comorbidity with other mental health disorders is high. In particular, work  
269 impairment and decreased earnings, divorce, and difficulties with child rearing are common  
270 (Kessler, 2000), multiplying the impact of the disorder by an untold amount. Finally, PTSD often  
271 occurs together with other disorders, including depression and substance use disorders (Brady,  
272 Killeen, Brewerton, & Lucerini, 2000), further compounding the impact.

#### 273 **1.1.2. PTSD Treatment**

274 Treatments for PTSD include both psychotherapeutic and pharmacologic modalities, with  
275 little existing systematic evidence for effectiveness. A 2008 Institute of Medicine (IOM) report  
276 on treatment effectiveness (2008) included a systematic review of available treatments and  
277 divided them into pharmacotherapies and psychotherapies, with an eye toward reviewing major  
278 clinical practice guidelines. At the time of publication, the research regarding the effectiveness of  
279 pharmacotherapies in the treatment of PTSD was deemed to be inadequate for making a  
280 determination of a preferred treatment. Similarly, the report found that, for all but one modality  
281 (exposure therapy), there was insufficient evidence to support the efficacy of psychotherapeutic  
282 treatments. An additional report released by the Agency for Healthcare Research and Quality  
283 (AHRQ) (Jonas et al., 2013), found similar results regarding the effectiveness of exposure  
284 therapy, but also characterized a handful of pharmacologic modalities as effective, though with  
285 significantly smaller effect sizes than exposure therapy.



286 Currently available treatment modalities for PTSD also have some significant  
287 disadvantages. Pharmacotherapies frequently come with side effects including, but not limited to,  
288 nausea, weight gain, headache, sexual dysfunction, and agitation. Furthermore, these medications  
289 may take up to 6 to 8 weeks of regular use before they begin to provide symptom relief  
290 (Alexander, 2012), during which time it is not uncommon for patients to develop side effects,  
291 which may result in discontinuation of the medication(s). Psychotherapeutic modalities tend to  
292 take an extended period of time to show an effect, frequently 6 to 24 months before the patient  
293 experiences significant relief (Sharpless & Barber, 2011). Also, some of the most effective  
294 therapies involve exposure to traumatic stimuli which, if improperly applied, may risk further  
295 deterioration of the patient (Rauch, Eftekhari, & Ruzek, 2012).

296 Patient adherence to and acceptability of prescribed treatments also impact treatment  
297 effectiveness. Health beliefs (Spoont, Sayer, & Nelson, 2005); knowledge of PTSD and its  
298 potential therapies (Gray, Elhai, & Frueh, 2004); and comorbid substance abuse, depression, and  
299 other conditions (Kronish, Edmondson, Li, & Cohen, 2012) all play a role in adherence to  
300 prescribed treatment regimens. TARRIER and colleagues (2006) conducted a study assessing the  
301 acceptability of different psychotherapeutic modalities for PTSD. They found that stigma  
302 associated with receiving treatment was a significant concern for study participants. Stigma has  
303 been shown to be a deterrent for service members to receive treatment for behavioral health  
304 concerns such as PTSD. In 2011, one of the key study researchers (Rae Olmsted et al., 2011)  
305 found that while all service members in their study reported stigma regarding treatment for  
306 behavioral health issues, those who had actually received behavioral health treatment perceived  
307 greater stigma associated with treatment. These researchers suggested that such stigma may  
308 result in higher likelihood of treatment failure or discontinuation (cf. Fung, Tsang, & Chan,  
309 2010), and that those who had previously received treatment may share their perceptions with  
310 other service members, in turn dissuading those service members from seeking help should they  
311 need it. Kim and colleagues (2011) have reported similar findings.

### 312 **1.1.3. Stellate Ganglion Block**

313 Given these concerns, there is a clear need for therapies for PTSD that are safe, effective,  
314 fast-acting, with few side effects, and with good patient acceptability and adherence.  
315 Sympathetic blockade, and stellate ganglion block (SGB) in particular, is hypothesized to fill this  
316 need. SGB is a procedure routinely performed since the 1920s to treat common conditions such  
317 as complex regional pain syndrome (CRPS), hot flashes, Raynaud's syndrome, hyperhidrosis,  
318 and other sympathetically mediated conditions. The stellate ganglion (SG) is a sympathetic  
319 ganglion located at the base of the cervical spine near the C7 transverse process. Sensory afferent  
320 projections from the heart and thoracic cavity to cervicothoracic dorsal root ganglia traverse the  
321 SG (Oldfield & McLachlan, 1978); second-order neurons in the ipsilateral spinal cord project to  
322 the thalamus, and via third-order neurons to the somatosensory cortex (Nozdrachev, Fateev,  
323 Jimenez, & Morales, 2003). The neurons in the paraventricular nucleus of the thalamus (PVN)  
324 appear to contact sympathetic preganglionic neurons (SPN) in the intermediolateral column of  
325 the spinal cord; those neurons project to the SG (Ranson, Motawei, Pyner, & Coote, 1998).  
326 Sympathetic postganglionic neurons then project from the SG to the heart and thoracic cavity.  
327 Other sympathetic efferents traverse the SG (Nozdrachev et al., 2003). The SG thus is a major  
328 sympathetic switching and transit station for the "fight-or-flight" response; interrupting this

329 complex circuitry with a local anesthetic could have observable effects on conditions mediated  
330 by similar responses, such as PTSD.

331 In SGB a local anesthetic is injected into the SG to “block” its function. To date, only a  
332 small number of case reports and series have been published about the effectiveness of SGB in  
333 treating PTSD, but the findings are intriguing and warrant further scientific investigation. In  
334 1990, Lebovits and colleagues (1990) described an adolescent female who had suffered multiple  
335 gunshot wounds and developed both reflex sympathetic dystrophy (RSD) and PTSD. The patient  
336 received 13 SGBs (for RSD) over 15 weeks and reported marked PTSD symptom improvement,  
337 characterized by significant reductions in intrusive memories and calmer mood. Nearly 20 years  
338 later, Lipov et al. (2008) reported a patient with insufficient reduction in PTSD symptoms from  
339 pharmacotherapy who underwent SGB 55 days post-trauma. The individual reported immediate  
340 resolution of his symptoms (80% to 90% reduction) as well as improved appetite and sleep. The  
341 symptoms, however, returned 32 days later, at which time pulsed radiofrequency energy was  
342 applied to the SG. Three months later, the patient reported a continued 90% improvement in all  
343 symptoms of PTSD. Mulvaney and colleagues (2010), including two of the co-investigators of  
344 the current study (Mulvaney and McLean), described two patients diagnosed with PTSD and  
345 treated with SGB. In both, post-treatment PTSD Checklist (PCL) scores were sub-threshold for  
346 PTSD diagnosis. One of the patients requested retreatment 3 months later; their symptoms  
347 remained diminished for an additional 7 months of follow up. Hicky et al. (2012) described 9  
348 military service members with chronic PTSD who were treated with SGB. Each of the  
349 participants had more than 1 year of unsuccessful treatment via pharmacotherapeutic and/or  
350 psychotherapeutic modalities. Following a single SGB, Clinician-Administered PTSD Scale  
351 (CAPS) assessments showed that 5 of the 9 patients experienced a clinically significant reduction  
352 in symptoms 1 week post-procedure. The effects of the procedure seemed to decrease within 1 to  
353 2 months, though symptoms that did return were not always as severe as they had been before  
354 the procedure. Of note, they also performed two repeat SGB treatments. One individual with no  
355 initial benefit also saw no improvement following a second block, whereas another who had seen  
356 the greatest reduction in symptoms experienced full remission after the second procedure.

357 Mulvaney et al. (2014) (including two other authors involved in this trial, Lynch and Kane)  
358 recently reported a case series of 166 patients, by far the largest in the literature. The PTSD  
359 Checklist – Military (PCL-M) was administered a day before treatment and repeated at 1 week  
360 and 1, 2, and 3-6 months post-SGB. An improvement in PCL-M scores of  $\geq 10$  was observed in  
361 73.5% of the 132 patients evaluated at 3-6 months. 24 subjects who had a positive response for at  
362 least 3 months and then had the return of symptoms were treated with a second SGB; their PCL-  
363 M response trends were similar to those with their first SGB.

364 These findings support the need for a randomized, blinded, sham-procedure-controlled trial  
365 to rigorously study the efficacy of SGB for treatment of PTSD symptoms.

#### 366 **1.1.4. Theoretical Models**

367 There are few published theoretical models that seek to explain the effectiveness of SGB for  
368 PTSD. Lipov and colleagues (2009) proposed that the procedure causes its effect via an  
369 interaction between the SG and key brain areas known to modulate PTSD, including the insular  
370 cortex (Liberzon & Martis, 2006) and the amygdala (Rauch et al., 2000). This hypothesis has  
371 been challenged, however, as being based on faulty understanding of some of the explanatory

372 research cited by the authors (Alino, 2011). In another theoretical model, Uchida, Tateda, and  
373 Hino (2002) proposed that SGB effects are through the involvement of the pineal gland and the  
374 regulation of melatonin secretion. The authors note that their hypothesized mechanism of action  
375 is based on foundations of Oriental medicine, as opposed to Western medicine. Nonetheless, the  
376 case report and series literature provide support for the evaluation of SGB as a procedure to help  
377 ameliorate the symptoms of PTSD.

## 378 **1.2. Rationale for the Current Study**

379 Because SGB is routinely done in the military for indications such as complex regional pain  
380 syndrome, and occasionally for treatment of PTSD symptoms (i.e., approximately 25 per month  
381 at WAMC), there is an unequalled opportunity to collect data and assess the effectiveness and  
382 patient acceptability of the procedure for a relatively low cost. Though there is not compelling  
383 supporting evidence, currently SGBs are performed as treatment for PTSD at the request and  
384 referral from a behavioral health provider (BHP) or other provider. Efficacy of the treatment  
385 should be established now, before its use becomes more widespread and “accepted,” and thus the  
386 conduct of a randomized, sham-procedure-controlled study becomes significantly less feasible.

387 In its original formulation, this study was envisioned to be fully double blinded, with the  
388 physicians performing the intervention administering 5-7 mL of study drug (either 0.5%  
389 ropivacaine or saline) at the stellate ganglion. However, in a recently presented randomized,  
390 controlled trial of SGB for treatment of PTSD (McLay et al., 2015), no differences in CAPS  
391 scores were observed between subjects who received a 7 mL 0.5% ropivacaine injection at the  
392 stellate ganglion and those who received 7 ml of normal saline superficial to the anterior tubercle  
393 of C6. The trial was smaller (42 subjects), only one of up to three SGB was placebo controlled  
394 and blinded (the first), and selection criteria were broad and included subjects with potential  
395 secondary gain. Nevertheless, it failed to meet a lower bar than afforded by a fully blinded study  
396 design. Given these data and also the fact that the injection of 5-7 mL of saline around and/or  
397 into the stellate ganglion could itself have significant (though likely brief) functional effects,  
398 addressing the question “does application of a long-acting anesthetic at the stellate ganglion have  
399 a different effect than that of an equal volume of saline on PTSD symptoms assessed by the  
400 CAPS?” seems to the Investigators a less practical and relevant question to address than “does  
401 interruption of function of the stellate ganglion with a standardized approach using a long-acting  
402 anesthetic have a different effect than a nearby sham injection (without any theoretically relevant  
403 mechanism of action) on PTSD symptoms as assessed by the CAPS?” Only the physicians  
404 administering the intervention and their immediate team will be unblinded; all other study  
405 personnel and the participants themselves will not be informed of treatment arm assignment.

406 In order for the benefits of SGB and other treatment to be realized, service members must be  
407 willing to initiate and engage in treatment. Individual understanding of treatment options,  
408 mechanisms, and effectiveness is a key determinant of treatment acceptability (Sayers et al.,  
409 2009; Shiner et al., 2013). However, individuals filter information about treatment options  
410 through values and beliefs that impact how information is processed and understood (Charles,  
411 Gafni, & Whelan, 1999; Charles et al., 2006). Extensive evidence supports the premise that  
412 service members’ beliefs and values related to mental health treatment are powerfully influenced  
413 by military culture including their perceptions of stigma associated with mental health issues and  
414 treatment (Vogt, 2011). Therefore, we have integrated a concurrent qualitative study into the

415 clinical trial to examine the benefits and drawbacks of SGB in comparison to other treatment  
416 options for PTSD.

417       Should SGB be demonstrated to be effective, findings from the qualitative study will inform  
418 communication about the procedure between providers and service members. Our findings will  
419 also contribute to efforts to encourage utilization of other evidence based PTSD treatments.

420 **2. OBJECTIVES**

421 **2.1. Clinical Effectiveness Trial**

422 The primary objective of the effectiveness study is:

- 423 • to evaluate whether right-sided SGB performed at 0 and 2 weeks will improve the  
424 CAPS-5 total symptom scores between baseline and 8 weeks

425 The secondary objectives of this study are:

- 426 • to evaluate whether right-sided SGB performed at 0 and 2 weeks will improve PTSD  
427 symptoms as reflected by corresponding PCL-5 items between baseline and 8 weeks

- 428 • to explore the association between the main outcome and potential confounding  
429 variables (e.g., concomitant medications, duration of PTSD, post-block Horner's  
430 syndrome, etc.)

- 431 • to evaluate whether right-sided SGB performed at 0 and 2 weeks will reduce distress  
432 (K6), suicidality (M.I.N.I.-Plus Suicidality), anxiety (GAD-7), depression (PHQ-9),  
433 alcohol use (AUDIT-C/AUDIT) or pain (short pain scale) between baseline and 8 weeks

- 434 • to evaluate whether right-sided SGB performed at 0 and 2 weeks will improve physical  
435 and mental (SF-12) condition between baseline and 8 weeks

436 **2.2. Acceptability Study**

- 437 • to assess perceptions of SGB in relation to other PTSD treatment options among service  
438 members who have received the procedure and inform communication with service  
439 members before, during, and after the procedure.

440

441

### 442 3. STUDY DESIGN

#### 443 3.1. Clinical Effectiveness Trial Treatment Plan and Regimen

444 This will be a multisite, randomized, blinded, sham-procedure-controlled study to evaluate  
445 the efficacy of unilateral right-sided stellate ganglion block (SGB) on the acute symptomatology  
446 of PTSD, evaluated by the CAPS-5 pre-treatment and at 8 weeks. Participants will be centrally  
447 randomized to 2:1 active:sham SGB and will be evaluated at Womack Army Medical Center in  
448 North Carolina, Tripler Army Medical Center in Hawaii, and Landstuhl Regional Medical Center  
449 in Germany. Randomization will be stratified by site so that each will have a 2:1 active:sham  
450 ratio.

451 On the day of the procedure, clinic nursing staff will perform standard nursing intake to  
452 include brief interim history, review of systems, vital signs, and placement of intravenous  
453 catheter. The attending physician will perform a targeted history and physical, paying attention  
454 to potential contraindications to SGB (e.g., infection at the site of injection, current  
455 anticoagulated state, presence of mass distorting the tissues, recent myocardial infarction,  
456 contralateral phrenic nerve palsy, glaucoma). The physician will also give a brief explanation of  
457 the procedure as well as a review of risks and potential benefits, though these will have been  
458 described to the participants beforehand.

459 Injections will be performed under ultrasound visualization. The study medication will be  
460 either 7-10 mL 0.5% ropivacaine injected ventral to the right longus coli muscle (around and into  
461 the ventral fascia) and into the longus coli immediately dorsal to the presumed ventral fascia at  
462 the level of the C6 anterior tubercle (landmarks for the stellate ganglion) (active study  
463 medication) or 1-2 mL preservative free normal saline injected anterolateral to the anterior  
464 tubercle of C6 (sham procedure). The participant will not be informed which treatment he or she  
465 has received; the interaction of the participant and treating physician will be scripted as much as  
466 possible. Customary vital signs will be recorded. MEDCOM 40-54 dated Feb 09 provides “a  
467 standard process and procedure for surgical and procedural site verification of patients  
468 undergoing operative or other invasive procedures”. In accordance with this regulation, the  
469 participant’s identity, the procedure to be performed, and the specific site of the procedure will  
470 be verified. A separate paper Case Report Form (CRF) will be created for the procedure; this  
471 information will not be shared with anyone outside the treatment suite (Research Coordinator  
472 (RC), participant, other members of the RTI project team, etc.). It is critical that only the  
473 physician administering the treatment (and his immediate team) be aware of the participant’s  
474 assignment to active or sham intervention. Following the intervention, the treating physician  
475 should have no further contact with the participant except as required for participant safety. At  
476 no point in time during the conduct of the trial should the physician or treatment team disclose  
477 by verbal or non-verbal communication the intervention received by the participant. Once an  
478 individual participant completes their participation in the trial, they may be offered an unblinded  
479 standard SGB as clinically indicated, but they will remain blinded to their treatment arm. After  
480 an individual participant completes their portion of the study (i.e., after completion of the Week  
481 8 instruments and their second CAPS-5), if an independent clinician providing care to the  
482 participant needs to know the intervention assignment of that particular participant in order to  
483 make clinical treatment decisions, a request may be made to the study PI (Dr. Walters) for  
484 unblinding. Dr. Walters (blinded) will evaluate the request and, if granted, will notify an

485 unblinded RTI colleague to provide the intervention information to the clinician for use in  
486 clinical decision-making; the clinician, however, is not to disclose the participant’s intervention  
487 information to anyone else.

488 Immediately following the procedure, the participant will be observed in the procedure suite  
489 prior to transport to the recovery area for assessment of potential complications that could  
490 require immediate intervention, according to local clinic policy. They then will be taken to the  
491 post-procedure recovery area, where monitoring of vital signs will continue under the  
492 supervision of the recovery nurse for 20 minutes or longer, as dictated by clinic policy and  
493 participant condition. The study RC will use metrics to assess for a Horner’s syndrome ([Section](#)  
494 [6.3](#)). A successful block will be recognized by the RC and perhaps by the participant (although  
495 we are unaware of data pertaining to possible signs and symptoms from saline injection near the  
496 SG). The RC will not share outcome information with the physician or the participant. While we  
497 cannot completely prevent the possibility of inadvertent un-blinding of study participants who  
498 may be familiar with the significance of developing signs and symptoms of SGB, no implicit or  
499 explicit confirmation will be given to the participants by the research team. This is a limitation of  
500 the proposed study and indeed any study with participant-accessible outcomes following an  
501 intervention.

502 Study intervention will be administered at week 0 and at week 2.

503 Participants will be evaluated for PTSD symptomatology prior to week 0 and at 8 weeks  
504 using the Clinician-Administered PTSD Scale for DSM-5 (CAPS-5). They will complete the  
505 PTSD Checklist for DSM-5 (PCL-5), the PTSD Checklist – Civilian Version (PCL-C), and the  
506 M.I.N.I.-Plus Suicidality Items at 0, 2, 4, 6, and 8 weeks; they also will complete the M.I.N.I.-  
507 Plus items at screening. The SF-12, GAD-7, PHQ-9, K6, AUDIT-C/AUDIT, and a short pain  
508 scale will be completed at weeks 0, 4, and 8.

509 **Table 1. Assessment Schedule**

|                        | Screener | Baseline | 2 Weeks | 4 Weeks | 6 Weeks | 8 Weeks |
|------------------------|----------|----------|---------|---------|---------|---------|
| CAPS-5 and LEC-5       | X*       |          |         |         |         | X       |
| PCL-5                  |          | X        | X       | X       | X       | X       |
| PCL-C                  | X        | X        | X       | X       | X       | X       |
| M.I.N.I.-Plus SI Items | X        | X        | X       | X       | X       | X       |
| AUDIT-C/AUDIT          | X        | X        |         | X       |         | X       |
| K6                     |          | X        | X       | X       | X       | X       |
| PHQ-9                  |          | X        |         | X       |         | X       |
| GAD-7                  |          | X        |         | X       |         | X       |
| SF-12                  |          | X        |         | X       |         | X       |
| Short pain scale       |          | X        |         | X       |         | X       |
| Current medications    |          | X        |         | X       |         | X       |

510 \*Not an inclusion/exclusion criterion despite being administered before baseline.

511 Individuals who participate in study assessments during off-duty hours will be eligible for  
512 payments as follows:

513 1<sup>st</sup> CAPS interview: \$15  
514 Week 0 assessment: \$10  
515 Week 2 assessment: \$10  
516 Week 4 assessment: \$15  
517 Week 6 assessment: \$15  
518 Week 8 assessment: \$15  
519 2<sup>nd</sup> CAPS interview: \$15  
520 Qualitative Interview: \$20  
521

522 Payment will be in the form of Amazon or Visa gift cards.  
523

### 524 **3.2. Acceptability Study Design**

525 The qualitative study will use focus groups, small group interviews, and individual  
526 interviews to compile a range of perspectives on service members' decision-making processes  
527 and information needs related to SGB. Participants will include service members, spouses, and  
528 providers. Data collection will occur at each study site because attitudes conveyed by leadership  
529 and chain of command may vary across installation. Scheduling will be based on the  
530 accumulation of ample service members indicating an interest in participating.

531 Participating service members will have received at least one SGB and/or study procedure  
532 within the prior 3 months, although this interval may be expanded if necessary for recruitment  
533 into focus groups. Because all study staff (with the exception of the physicians administering the  
534 study intervention) are blind with respect to treatment status, participants will include  
535 participants from both active and sham procedure arms. To increase homogeneity within focus  
536 groups and avoid potential distress among participants who do not experience symptom relief,  
537 groups will be stratified based on positive versus neutral or negative subjective assessment of  
538 change at the 4-week assessment (see [Section 6.4.12](#)) or at the time of screening for the  
539 qualitative study. Because beliefs and attitudes related to behavioral health treatment are likely to  
540 vary according to pay grade, separate groups will be held for lower enlisted service members and  
541 NCOs. Officers, if available as participants, will be interviewed individually. Data collection will  
542 address perceived benefits and drawbacks of SGB and other treatment options for PTSD;  
543 information needs before, and during the procedure; and participants' description of the effects  
544 of the procedure.

545 Spouses may have questions and concerns regarding SGB and other treatment options that  
546 differ from those of their service members. Spouses can also provide input that may vary from  
547 that which is perceived or reported by service members. All married service members and their  
548 spouses will be eligible to participate in a participant-spouse interview. Data collection with  
549 spouses will be conducted in joint interviews, in which both members of the couple are  
550 interviewed at the same time by one interviewer. Interview topics will parallel those used in the  
551 service member focus groups. Joint interviews will avoid the risk of inadvertent breach of  
552 confidentiality among spouses. They will also allow comparison of the perspectives of the  
553 spouse and the service member.

554 Providers will include physicians who administer SGBs, and both Behavioral Health  
555 providers and other (e.g., Family Medicine) physicians who have or could potentially refer  
556 service members for the procedure. Data collection with providers will consist of small focus



557 groups, addressing provider views of how SGB complements or adds to available modalities, and  
558 how the procedure should be communicated to service members. If scheduling small focus  
559 groups with providers is unfeasible, we will conduct individual interviews with providers  
560 according to their availability.

561 Focus groups, small group interviews, and individual interviews will be scheduled to best  
562 accommodate the participants. This will include evenings and weekends if these are deemed to  
563 be the most appropriate time. Active duty participants will be reminded that in order for them to  
564 be given an incentive for taking part in this component of the study, their participation must be  
565 on their own time. Those who participate in the acceptability study on their own time will  
566 receive a \$20 Amazon or Visa gift card following the completion of their participation.

567

568

## 569 **4. PARTICIPANT POPULATION**

### 570 **4.1. Clinical Effectiveness Trial**

#### 571 **4.1.1. Number of Participants**

572 A total of up to 240 participants will be enrolled at the three sites.

#### 573 **4.1.2. Inclusion Criteria**

574 Participants must meet *all* of the following inclusion criteria to be eligible for participation  
575 in this study.

- 576 • Active duty status
- 577 • Personal access to Internet
- 578 • Anticipated stable assignment to installation for at least 2 months
- 579 • Stable dosing for  $\geq 3$  months, if receiving psychotropic medications
- 580 • Prior to enrollment, *offered* PTSD treatment using A-level modality (as defined by  
581 MEDCOM policy 14-094; 18 Dec 2014). A-level psychotherapies are defined as  
582 individually provided “trauma-focused psychotherapy that includes components of  
583 exposure and/or cognitive restructuring; or stress inoculation training”  
584 (Narration/imaginal exposure; cognitive restructuring; in-vivo exposure; relaxation or  
585 stress modulation skills; psychoeducation). Relevant manualized treatments include  
586 Prolonged Exposure Therapy, Cognitive Processing Therapy, and Eye Movement  
587 Desensitization and Reprocessing. A-level pharmacotherapies include Selective  
588 Serotonin Reuptake Inhibitors and Serotonin Norepinephrine Reuptake Inhibitors, as  
589 well as adjunctive prazosin.
- 590 • PCL-C score of 32 or greater at screening
- 591 • Acceptable clinically indicated preoperative laboratory studies, per standard site-specific  
592 protocols

#### 593 **4.1.3. Exclusion Criteria**

594 Potential participants who meet *any* of the following exclusion criteria are not to be enrolled  
595 in this study.

- 596 • Prior SGB
- 597 • Allergy to amide local anesthetics (e.g., ropivacaine, bupivacaine)
- 598 • Pregnancy (evaluated by urine test pre-procedure)
- 599 • Current anticoagulant use
- 600 • History of a bleeding disorder
- 601 • Infection or mass at injection site
- 602 • Myocardial infarction within 6 months of procedure

- 603 • Phrenic or laryngeal nerve palsy (hoarseness)
- 604 • History of glaucoma
- 605 • History of schizophrenia, other psychotic disorder, bipolar disorder, or personality
- 606 disorder (axis 2) as verified by medical record review by an Army Co-Investigator with
- 607 access to medical records
- 608 • Moderate or severe traumatic brain injury as verified by medical record review by an
- 609 Army Co-Investigator with access to medical records
- 610 • Symptoms of moderate to severe substance use disorder in past 30 days
- 611 • Suicidal ideation in the past 2 months, documented by the M.I.N.I.-Plus Suicidality
- 612 Items
- 613 • Any ongoing other major life stressor or condition not listed here that the site
- 614 Investigator believes clearly would place the participant at risk for injury or a poor
- 615 outcome (including anniversary of the inciting event, pending divorce, undergoing
- 616 medical board/retirement, undergoing UCMJ or pending legal administrative actions,
- 617 significant illness in participant or family)

**4.2. Acceptability Study**

**4.2.1. Number of Participants**

A total of up to 193 participants across the 3 sites will be enrolled in the qualitative study. Participants will include up to 131 service members, up to 14 spouses of service members, and up to 48 providers. The expected allocation of participants by pay grade and subjective assessment of change is shown in **Table 2**. These numbers will be adjusted to proportionally reflect study participants.

**Table 2. Number of Participants in Qualitative Study**

|                                              |                   | Total                 |             |                |             |        |             |
|----------------------------------------------|-------------------|-----------------------|-------------|----------------|-------------|--------|-------------|
|                                              |                   | Reporting Improvement |             | No Improvement |             | Total  |             |
|                                              |                   | Groups                | Individuals | Groups         | Individuals | Groups | Individuals |
| <b>Service members</b>                       |                   |                       |             |                |             |        |             |
|                                              | Lower enlisted    | 8                     | 48          | 4              | 24          | 12     | 72          |
|                                              | NCOs              | 3                     | 18          | 3              | 18          | 6      | 36          |
|                                              | Officers          |                       | 6           |                | 3           |        | 9           |
| <b>Service member/<br/>spouse interviews</b> |                   |                       |             |                |             |        |             |
|                                              | Lower enlisted    | 6                     | 12          | 6              | 12          | 12     | 24          |
|                                              | NCOs              | 1                     | 2           | 1              | 2           | 2      | 4           |
| <b>Providers</b>                             |                   |                       |             |                |             |        |             |
|                                              | Family Medicine   |                       |             |                |             | 4      | 16          |
|                                              | Behavioral Health |                       |             |                |             | 4      | 16          |
|                                              | SGB Physicians    |                       |             |                |             | 4      | 16          |

|                 | Total                 |             |                |             |        |             |
|-----------------|-----------------------|-------------|----------------|-------------|--------|-------------|
|                 | Reporting Improvement |             | No Improvement |             | Total  |             |
|                 | Groups                | Individuals | Groups         | Individuals | Groups | Individuals |
| <b>Total</b>    | 18                    | 86          | 14             | 59          | 44     | 193         |
| Service members |                       |             |                |             |        | 131         |
| Spouses         |                       |             |                |             |        | 14          |
| Providers       |                       |             |                |             |        | 48          |

626 **4.2.2. Inclusion Criteria**

627 The following inclusion criteria apply to the qualitative study:

- 628 • Service members must have received at least one SGB and/or study procedure during  
629 the past three months at a participating study site (as a participant in the clinical  
630 effectiveness trial or outside of the study)
- 631 • For clinical trial participants, they must have indicated willingness to participate in the  
632 qualitative study when asked by the RC at baseline data collection
- 633 • For non-clinical trial participants, they must be active-duty status
- 634 • A service member/spouse dyad will consist of a service member meeting the above  
635 criterion and his/her spouse, when the spouse has responded to the fact sheet describing  
636 the study (**Appendix 19-5**, given to the service member at screening)
- 637 • Providers will be Behavioral Health or other (e.g., Family Medicine) clinicians who  
638 have referred or could potentially refer service members to the study, and physicians who  
639 administer SGBs.

640 **4.2.3. Exclusion Criteria**

641 Service members will be excluded from the qualitative study if participation would cause  
642 them undue distress, in the opinion of the RC or treating clinician.

643

## 644 **5. STUDY DRUGS**

### 645 **5.1. Randomization and Blinding**

646 Participants eligible for the study will be randomized to either the sham or active treatment.  
647 Randomization will be conducted using a permuted block design and stratified by site to ensure  
648 that the 2:1 active:sham ratio is achieved at each center.

649 The control will be a sham injection of saline near the SG. The physicians administering the  
650 intervention will perforce be unblinded. However, all others involved in the trial (RC,  
651 participants, RTI study personnel, etc.) will be blind to the administered treatment, and the sole  
652 interaction of the participants with the treating physicians will be in the treatment suite (except as  
653 required for participant safety). Also, the RC will not discuss the post-procedure presence or  
654 absence of a Horner's syndrome with the Investigator or participant.

### 655 **5.2. Description and Handling of Study Drug**

656 Ropivacaine hydrochloride 0.5% for injection is FDA approved for use in SGB. Sterile  
657 normal saline for injection also is commercially available. There will be site-specific protocols  
658 for drawing up the study drug; these will produce sufficient documentation to identify which  
659 participants received active or sham intervention.

#### 660 **5.2.1. Formulation**

661 The sterile saline for injection and ropivacaine will be used as commercially formulated and  
662 approved.

#### 663 **5.2.2. Packaging and Labeling**

664 Packaging and labeling of ropivacaine and saline will be per site procedure and protocols.  
665 The syringes used to administer the active and sham interventions will be indistinguishable by  
666 the participants.

#### 667 **5.2.3. Storage and Handling**

668 The storage and handling of the agents will be per site procedures and protocols.

### 669 **5.3. Dosage and Administration of Study Drug**

670 The study drug (7-10 mL 0.5% ropivacaine or 1-2 mL saline) will be administered by the  
671 site Investigator per the ultrasound-visualized protocol used at the site.

## 672 **6. STUDY PROCEDURES (APPENDIX 1)**

### 673 **6.1. Participant Enrollment and Treatment Assignment**

674 Participants will be active duty service members who meet inclusion criteria (as described  
675 above). Based on our power calculations, we anticipate enrolling approximately 240 participants  
676 (80 per site) into the trial, with 160 being randomized into the active arm and 80 into the control  
677 arm. Assignment to active or sham will be stratified per site.

678 At each of the three study sites, a qualified Research Coordinator (RC) will be staffed by the  
679 project to oversee all recruiting, screening, enrollment, and assessment activities. While these  
680 activities will generally be considered the RC's responsibility and will primarily be completed by  
681 the RC, the site PI and approved RTI staff may also complete all recruiting, screening,  
682 enrollment, and assessment activities. For conventional forces, the primary mechanism for  
683 recruitment will be through Behavioral Health providers (BHP) or Family Medicine or other  
684 physicians within the installation referral area. They will identify individuals whom they think  
685 are good candidates for participation in the clinical trial and then briefly explain the study. If the  
686 service member is interested in participating, then the provider will give the individual an  
687 interest card on which contact information can be written (Name, email address, phone number).  
688 These interest cards will be kept by the providers and the RC will collect them periodically. The  
689 interest card also will have the email address of the RC. If the individual prefers he/she can  
690 simply email the RC to indicate interest rather than filling out the interest card.

691 We will also post the study's approved poster at appropriate locations and send both  
692 approved poster and e-mail (**Appendix 2**) through the study sites' social media outlets, as well as  
693 in bulletins, newsletters, listservs, mass e-mail, an Armed Forces Network (AFN) advertisement,  
694 and other electronic means. We will go through proper approval channels for official military  
695 outlets. RCs may disseminate approved study materials at various locations where approval to do  
696 so has been obtained. Examples may include but are not limited to on-post events where service  
697 members, spouses, or others may be present; presentations to Family Readiness Groups and  
698 similar organizations; and distribution of study materials at locations within the facilities where  
699 large numbers of people are known to pass. We will post approved material on a study Facebook  
700 page and ads including only approved materials via Facebook advertising. Additionally, we will  
701 engage Public Affairs Officers (PAO) at each study site to promote the study via approved  
702 news/press and other electronic means.

703 We also anticipate that some individuals may "self-refer" to the study as a result of having  
704 seen one of the posters or interest cards that may be displayed at the clinics or simply by word of  
705 mouth. If these "self-referrers" contact either the local RC or other study staff, they will be  
706 thanked for their interest and then informed that in order to take part in the study, they need to be  
707 referred by a mental health or medical provider. For USASOC, there are two potential referral  
708 routes. First, currently there are WAMC Behavioral Health assets embedded within USASOC;  
709 that is, when Dr. Bartoszek briefs the WAMC Behavioral Health providers, the USASOC-  
710 embedded assets will be included. Second, unit assets within USASOC will be made familiar  
711 with the study's protocols and will refer appropriate individuals to the study RC.

712 The RC will contact by telephone (**Appendix 2**) those who have expressed interest in the  
713 study, to explain the study, including the possibility of being randomized to a sham group, and

714 invite them to participate. The RC will provide a study overview and answer any questions that  
715 individuals may have about participation. Once individuals have agreed to take part in the study,  
716 they will be asked a few pre-screening questions over the telephone to determine basic eligibility  
717 (i.e., lack of prior SGB procedure, currently on active duty, with access to the Internet, no plans  
718 to transfer to a different installation in the coming 2 months, not undergoing medical  
719 board/retirement, and not undergoing UCMJ or pending legal administrative actions; also  
720 **Appendix 2**). Those who pre-screen by phone as ineligible will be thanked for their time and  
721 will not be contacted again for the study. Participants who pre-screen as eligible and are located  
722 geographically close to the study site will be asked to come to the RC's office to complete the  
723 consenting process in person, and to complete computer-based screening which will assess our  
724 other study inclusion and exclusion criteria. We expect this to be the majority of our  
725 participants.

726 However, because our study sites provide coverage for large geographic areas, we also  
727 likely will encounter some potential participants who are located a considerable distance from  
728 the study site, to the degree that it is impractical for them to physically come to the RC's office  
729 for the screening assessment, only to return home to wait for their CAPS phone interview.  
730 Consent will be obtained and documented as described below, and then these participants will be  
731 asked to complete the screening questions on-line or via telephone.

- 732 • An electronic copy of the ICF will be made available to the potential participant via the  
733 study website or email.
- 734 • The potential participant will be asked to print out a copy of the ICF.
- 735 • The RC will contact the potential participant and go through the consent form in detail  
736 to insure that the potential participant has read it. The RC will answer any questions.
- 737 • The RC will ask for a verbal consent from the potential participant and have that verbal  
738 consent confirmed by a witness who is with the participant.
- 739 • The RC will ask the participant and the witness to sign the ICF and return the signed  
740 signature page of the ICF to RTI in one of the following ways: 1) scan the page and  
741 upload it via RTI's secure web system, 2) fax the ICF to the RC, 3) take a photograph of  
742 the page with a mobile phone or digital camera and upload it via RTI's secure web  
743 system, or 4) return the page via mail.
- 744 • If the participant is deemed eligible and comes into the RC's office for the baseline  
745 interview, he/she will be asked to initial and sign a new (and newly witnessed) copy of  
746 the consent form before beginning the assessment.

## 747 **6.2. Pre-Treatment Assessments**

### 748 **6.2.1. Screening Visit**

749 Participants will be screened within 4 weeks prior to randomization to determine eligibility  
750 for participation in the study. The following will be performed and documented at screening in  
751 the RC's office, or over the phone if the participant is unable to make a dedicated screening trip  
752 to the RC's office (**Appendix 3**):

- 753 • Obtain written informed consent (see below for subjects unable to come to RC's office)

- 754 • Assessment of eligibility (see inclusion criteria [4.1.3] and exclusion criteria [4.1.4])
- 755 • Demographics and screening medical history performed by participant on RC laptop
- 756 (**Appendix 3**)
- 757 • Life Events Checklist-5 (LEC-5; **Appendix 4**), PCL-C (**Appendix 6**), M.I.N.I.-Plus
- 758 Suicidality Items (**Appendix 7**), AUDIT-C/Audit (**Appendix 8**) – performed by
- 759 participant on RC laptop

760 Participants meeting all of the inclusion criteria and none of the exclusion criteria will be  
761 scheduled for a baseline CAPS-5. Following administration of the CAPS-5, the RC will contact  
762 RTI to randomize the participant and will schedule the participant’s return to the clinic within 4  
763 weeks at week 0, their treatments in the clinic at weeks 0 and 2, their Web follow-ups at weeks 4,  
764 6, and 8, and their post-treatment CAPS-5 at week 8.

765 Participants who are not eligible for the study will be so informed, and if they choose this  
766 information will be provided back to their referring healthcare provider.

767 Because some study participants are physically located at a distance from the study site, it is  
768 possible that some may need to complete their screening remotely. In these instances, the  
769 prospective participant will receive the same screening content as those who are located locally  
770 and can complete the assessment in the RC’s office; however, they will provide their consent  
771 over the phone and then the screening will be performed by the RC. In addition, pre-existing  
772 Horner’s syndrome will be assessed at the first study visit (i.e., week 0) when they present for  
773 their initial study condition. At that time, intervening physicians will use their clinical judgment  
774 to determine whether an individual with a pre-existing Horner’s syndrome would be at increased  
775 risk from participating in the study. (Note that we expect presentation with a pre-existing  
776 Horner’s syndrome to be very rare - Dr. Bartoszek has indicated that he has never seen this in a  
777 patient.) If it is determined by the intervening physician that the reason for the Horner’s  
778 syndrome represents a risk to a study participant, the physician will inform that individual that  
779 they are ineligible and will answer any questions the individual might have.

#### 780 **6.2.2. Clinician-Administered PTSD Scale for DSM-5 (CAPS-5;** 781 **Appendix 9)**

782 The primary outcome measure will be the Clinician-Administered PTSD Scale, or CAPS-5  
783 (Weathers et al., 2013) (**Appendix 9**), which is the gold standard in clinical PTSD assessment.  
784 The CAPS-5 clinical interview is a 30-item structured interview that corresponds to the DSM-5  
785 criteria for PTSD. For each item, standardized questions and probes are provided; total scores  
786 range from 0 to 80. CAPS-5 requires the identification of a single index trauma to serve as the  
787 basis of symptom inquiry.

788 As part of the trauma assessment, the CAPS-5 includes the Life Events Checklist, or LEC-5  
789 (Weathers et al., 2013). The LEC-5 is a 17-item self-administered checklist of potential traumatic  
790 events. The CAPS-5 is our central outcome measure in support of primary objective 1. No notes  
791 will be added to a participant’s medical records record regarding the CAPS-5 assessment, as the  
792 clinicians administering the CAPS-5 will be subcontractors to RTI and will not have access to  
793 medical records.



794 *6.2.2.1. CAPS-5 Administration*

795 The LEC-5 will be administered at the time of initial screening by the RC. These data will  
796 be uploaded to a secure website accessible by the clinical interviewer (CI) in preparation for the  
797 CAPS-5 interview. The CAPS-5 was designed to be administered by clinicians and clinical  
798 researchers who have a working knowledge of PTSD, and will be conducted over the telephone  
799 by trained CIs, who will record all notes and clinical information on hardcopy CAPS-5 forms.

800 *6.2.2.2. Field Preparations: Clinical Interviewer Recruiting and Training*

801 Necessary CI credentials will include having completed doctoral coursework in clinical  
802 psychology, a willingness to participate in study training, and a willingness to meet specific  
803 scheduling requirements for the position. Study CIs will be recruited from a pool of  
804 approximately 100 seasoned veteran CIs located throughout the United States who meet these  
805 criteria. These CIs have completed hundreds of diagnostic interviews over the telephone for both  
806 the NSDUH Mental Health Surveillance Study (2008-2012) and the Group Project for Holocaust  
807 Survivors and Their Children (2013). Based on experience hiring CIs of this caliber for the  
808 NSDUH Mental Health Study, the NSDUH Clinical Validation Study, and the National Vietnam  
809 Veterans Longitudinal Study, we anticipate between 20% and 30% CI attrition; therefore, we  
810 will train two more CIs than our goal of four for data collection.

811 *6.2.2.3. Clinical Quality Control*

812 CAPS-5 training and clinical quality control will be led by a credentialed, licensed, and  
813 experienced clinical supervisor (CS) with expertise in PTSD and the CAPS-5. The CS will  
814 review 100% of hard-copy study clinical interview notes, item-by-item, comparing the notes  
815 provided by the CI and the scoring, and listening to the accompanying audio files as needed to  
816 ensure data accuracy. The CS will also review the full audio recordings for a randomly selected  
817 10% of the clinical interviews.

818 *6.2.2.4. Managing Distressed Respondents During CAPS-5 Administration*

819 A number of measures will be taken to enhance the safety of potentially distressed  
820 participants during telephone CAPS-5 administration. First, we will provide explicit protocols  
821 for CIs to follow if they encounter either passive or active suicidal or homicidal thoughts.  
822 Training and supervision will be provided for managing respondents who express sadness,  
823 agitation, frustration, or any other strong emotion during the course of the clinical interview. A  
824 detailed Distressed Respondent Protocol (DRP) (**Appendix 10**), which has been successfully  
825 used for the NSDUH Mental Health Surveillance Study, will be employed for this study. The  
826 DRP provides definitions and examples of five types of distressed respondents, along the  
827 continuum of no risk of harm (i.e., respondent is agitated or upset) to imminent danger (e.g.,  
828 respondent reports active suicidal thoughts, a plan, and a means to carry out that plan). The DRP  
829 then gives step-by-step instructions for handling each of the five types of distressed respondents.  
830 CIs will be thoroughly trained in the use of the DRP.

831 The DRP will be very similar to the system described in [Section 6.4.13](#) regarding  
832 management of distressed participants during automated assessments. Clinical interviewers will  
833 inform individuals at the beginning of the CAPS-5 that they need to obtain the individual's  
834 physical location (address) for the purposes of safety, that such information will not be stored,  
835 and that it will only be used in the case of an emergency. In the event that a respondent indicates

836 *active* suicidal or homicidal ideation during their CAPS-5, the clinician administering the CAPS-  
837 5 will call or (in the event that keeping the respondent on the phone is advisable) send a text  
838 message to study co-investigator Kristine Rae Olmsted and study logistics director Russ  
839 Vandermaas-Peeler indicating the nature of the ideation, physical location of the respondent (if  
840 known), and contact information for the respondent. Ms. Rae Olmsted or Mr. Vandermaas-Peeler  
841 will immediately call the respondent's CQ/duty phone number, CO, or 1SG to report the  
842 incident. Given the emergent nature of *active* suicidal or homicidal ideation, we believe that  
843 using text messaging and/or telephone communications is justified.

844 A second measure taken to enhance participant safety relates to the credentials of our CIs  
845 and the CS. Our study CIs will be seasoned clinicians with experience assessing risk and  
846 providing direct care for distressed individuals. Similarly, the CS will be a licensed clinical  
847 psychologist and certified health care provider. This supervisor will be integrally involved in  
848 supervising the CIs so that if a distressed respondent is encountered, his/her level of risk can be  
849 verified, and consultation and debriefing can be provided. After each encounter with a distressed  
850 respondent, the CI will immediately contact the supervisor to review the details of the incident,  
851 the assessment of risk, and the application of the DRP. If unusual circumstances arise, the  
852 supervisor will contact the study director and IRB.

853 Together, these methods have been effective and allowed us to properly handle 201  
854 incidents of distressed respondents in the NSDUH Mental Health Surveillance Study, which  
855 included cases involving suicidal ideation (n=155), homicidal ideation (n=4), and respondents  
856 who were agitated or upset (n=42).

### 857 **6.2.3. Baseline Assessments (Week 0, immediately before SGB)**

858 All instrument assessments in the following section will be administered via secure  
859 computer. Paper-and-pencil (PAPI) versions of the assessments will be available in the event that  
860 Internet services should be interrupted at a study site. If use of PAPI assessments becomes  
861 necessary, the RC will hand-key the participant's data upon restoration of Internet services; the  
862 original forms will be sent to RTI via a secure FTP site so that a second person can review the  
863 RC's data entry for accuracy.

#### 864 *6.2.3.1. Urine Pregnancy Test for Females of Child-bearing Potential*

865 A urine pregnancy test will be performed on all females of child-bearing potential. A  
866 positive test will end participation in this study.

#### 867 *6.2.3.2. PTSD Checklist for DSM-5 (PCL-5; Appendix 5)*

868 The PCL-5 is a 20-item self-report measure that assesses the 20 DSM-5 symptoms of PTSD.  
869 Its purposes include screening for PTSD and/or provisional diagnosis, and monitoring symptom  
870 change before, during, and after treatment. A total symptom severity score ranging from 0 to 80  
871 is possible (Weathers et al., 2013). Data on a clinically meaningful change are not yet available,  
872 nor are full psychometrics. We will administer the PCL-5 at baseline in order to be consistent  
873 with our use of the CAPS-5, and in order to establish a baseline score in support of secondary  
874 objective 1. (Note that we are including the instrument in this study at all assessment time points,  
875 despite its current lack of psychometric testing and clinically meaningful change data, because it  
876 represents the most up-to-date standard of self-administered PTSD assessment.) We anticipate  
877 that full psychometrics will be available for our final data analysis in 2017.

878 **6.2.3.3. PTSD Checklist - Civilian Version (PCL-C; Appendix 6)**

879 There are three versions of the PCL for DSM-IV, including the PCL-C for civilians. This  
880 standardized assessment comprises 17 items corresponding to the key symptoms of PTSD from  
881 the DSM-IV. The total symptom severity score ranges from 17 to 85. The PCL-C has been  
882 thoroughly validated and deemed reliable (Convbeare, Behar, Solomon, Newman, Borkovec,  
883 2012; Weathers et al., 1993). Because data regarding clinically meaningful change are  
884 unavailable for the PCL-5, and because full psychometrics for the PCL-5 are not yet available,  
885 we will be administering the PCL-C at baseline in order to establish study eligibility as well as a  
886 baseline score in support of secondary objective 1.

887 **6.2.3.4. Mini-International Neuropsychiatric Interview (M.I.N.I.)-Plus Suicidality Items**  
888 **(Appendix 7)**

889 The M.I.N.I.-Plus is a structured interview for diagnosing DSM-IV and ICD-10 psychiatric  
890 disorders (Sheehan et al., 1998). This study will use a subset of items from the full instrument  
891 geared toward identifying individuals experiencing suicidal ideation in the past 2 months.  
892 Response options are dichotomous (yes/no) and questions ask about desire, thoughts, planning,  
893 taking steps toward, and attempting suicide as well as deliberate injury without intent to kill  
894 oneself. Individuals answering affirmatively to any of the first 7 items regarding suicidal ideation  
895 in the previous 2 months will be asked to complete an additional 4 questions regarding any  
896 *current* desire to harm themselves, thoughts about suicide, plans for suicide, and active steps  
897 they may be taking.

898 The suicidal ideation assessment will be administered at initial screening so as to identify  
899 (and exclude) individuals deemed to be at elevated risk for suicide attempt. Those who screen  
900 positive on the M.I.N.I.-Plus items, who are then asked the follow-up items regarding current  
901 ideation, will be excluded from the study; they will be evaluated and managed per the  
902 appropriate site-specific Standard Operating Procedure (SOP). The assessment will also be  
903 administered on weeks 0, 2, 4, 6, and 8. Because screening will already have taken place, these  
904 enrolled participants will still be included in the study. This instrument will enhance participant  
905 safety and support secondary objective 3.

906 **6.2.3.5. AUDIT-C/AUDIT (Appendix 8)**

907 The Alcohol Use Disorders Identification Test (AUDIT; Babor, Higgins-Biddle, Saunders,  
908 & Monteiro, 2001) will be used to assess potential alcohol abuse symptoms. The instrument was  
909 developed as a means of brief assessment and screening for excessive drinking. This 10-item  
910 scale is widely used and has been shown to be consistent with ICD-10 definitions for alcohol  
911 dependence and harmful alcohol use (Allen, Litten, Fertig, & Babor, 1997; Saunders, Aasland,  
912 Amundsen, & Grant, 1993).

913 The AUDIT-C (AUDIT alcohol consumption questions) consists of the first 3 items of the  
914 full AUDIT and assess frequency of drinking, typical quantity, and frequency of heavy drinking.  
915 In order to decrease participant burden, we will administer the AUDIT-C first; only those  
916 screening positive on these items will receive the remaining 7 items of the full AUDIT. It is  
917 administered in support of secondary objective 3.

918 6.2.3.6. *K6 (Appendix 11)*

919 The K6 was developed for use in the U.S. National Health Interview Survey (NHIS) as a  
920 means of assessing nonspecific psychological distress. While this study's active duty military  
921 population with PTSD may not be representative of the U.S. general population (Kessler et al.,  
922 2003; Kessler et al. 2002), we are including the K6 so as to assess any changes in serious  
923 psychological distress over time among study participants (secondary objective 3).

924 6.2.3.7. *PHQ-9 (Appendix 12)*

925 Depression symptoms will be assessed using the validated PHQ-9 (Kroenke, Spitzer, &  
926 Williams, 2002) in support of secondary objective 3. The PHQ-9 was developed as a short form  
927 of the full Patient Health Questionnaire, which was a self-administered version of the PRIME-  
928 MD instrument (Kroenke, Spitzer, & Williams, 2001; Kroenke & Spitzer, 2002; Löwe, Unutzer,  
929 Callahan, Perkins, & Kroenke, 2004).

930  
931 6.2.3.8. *GAD-7 (Appendix 13)*

932 Generalized anxiety symptoms will be assessed via the GAD-7 (Spitzer, Kroenke, Williams,  
933 & Löwe, 2006) in support of secondary objective 3. The instrument was designed to be  
934 administered in general health settings as part of the Primary Care Evaluation of Mental  
935 Disorders (PRIME-MD) assessment (Spitzer et al., 1994), and has been validated by a number of  
936 studies (Spitzer et al., 2006; Kroenke, Spitzer, Williams, Monahan, & Löwe, 2007).

937 6.2.3.9. *SF-12 (Version 2.0) (Appendix 14)*

938 The SF-12 is a shortened version of the SF-36, which was designed as a general health  
939 utility index. Consisting of 12 items, the SF-12v2 improves on the original SF-12 and includes  
940 simplified wording, better usability, and multi-level response options. The twelve items provide  
941 an estimate for eight domains of functional health and well-being: physical functioning, role-  
942 physical, bodily pain, general health, vitality, social functioning, role-emotional, and mental  
943 health. Together, the first four domains constitute a Physical Health summary measure, and the  
944 second 4 constitute a Mental Health summary measure (Ware, Kosinski, & Keller, 1996; SF-  
945 36.org, n.d.). This assessment will be used as a measure of general functioning in support of  
946 secondary objective 4.

947 6.2.3.10. *Short pain scale (Appendix 15)*

948 Because pain frequently presents with PTSD and may play a confounding role in treatment  
949 effectiveness (Beck & Clapp, 2011; Kulich, Mencher, Bertrand, & Maciewicz, 2000; Moeller-  
950 Bertram, Keltner, & Strigo, 2012), we will administer a 0-10 Likert-type numeric pain scale  
951 where 0 represents "No pain," 5 represents "Moderate pain," and 10 represents "Worst possible  
952 pain." While Visual Analog Scales, Verbal Rating Scales, and Numeric Rating Scales have all  
953 been deemed valid and reliable (Williamson & Hoggart, 2005), we opted for a numeric scale due  
954 to prospective study participants' likelihood of being familiar with the scale, which is commonly  
955 used in clinical practice at the three participating study sites. The pain scale will be administered  
956 in support of secondary objective 3.

957 *6.2.3.11. Current Medications (Appendix 16)*

958 In order to assess the potential impact of medication use concurrent with study participation,  
959 we will ask study participants about their use of prescription psychotropics (including stimulants,  
960 anxiolytics, and depressants), anticonvulsants, anticholinergic drugs, and  
961 sympathomimetics/sympatholytics. Given that the mechanism of action of SGB is unknown but  
962 likely involves some combination of central, peripheral, and autonomic pathways, use of these  
963 medications could be confounding. These data will be collected to support secondary objective 2.

964 *6.2.3.12. Other Questions (Appendix 17)*

965 Additional questions will be asked at week 0 that are not part of an established, standardized  
966 assessment. In order to determine whether duration of PTSD symptoms moderate any treatment  
967 effects that may be seen in our study, we will ask study participants whether they have been  
968 diagnosed with posttraumatic stress (PTS) or posttraumatic stress disorder (PTSD), and if so, the  
969 month and year when they received this diagnosis. For those who indicate that they have not  
970 been diagnosed, we will ask for the approximate month and year when their symptoms started.

971 Similarly, because nicotine has a direct impact on the sympathetic nervous system, we will  
972 ask study participants four items that will allow for calculation of estimated pack years for  
973 cigarette smoking. These items will establish age at initiation of regular smoking, smoking  
974 longevity (whether they have smoked at least 100 cigarettes in their lifetime), recency of regular  
975 smoking, and number of cigarettes typically smoked. The resulting pack-year estimate will be  
976 assessed for any moderation of treatment effects among study participants. A similar estimate  
977 will be computed for chewing tobacco, snuff, or other smokeless tobacco exposure.

978 **6.3. Treatment and Treatment Assessments (Weeks 0 and 2)**

979 The PCL-5, PCL-C, K6, and the M.I.N.I.-Plus Suicidality Items will be administered prior  
980 to the procedure at week 2.

981 Standard right-sided SGBs will be performed in accordance with this protocol ([Section 3.1](#)).  
982 On the day of the procedure, clinic nursing staff will perform standard nursing intake to include  
983 brief interim history, review of systems, vital signs, and placement of intravenous catheter.  
984 Females of child-bearing potential will have a urine pregnancy test. The treating physician will  
985 perform a targeted history and physical, paying attention to potential contraindications to SGB.  
986 At week 0, the physician will also give a brief explanation of the procedure as well as a review of  
987 risks and potential benefits, though these will have been described to them beforehand.

988 Injections will be performed under ultrasound visualization. The study medication will be  
989 either 7-10 mL 0.5% ropivacaine injected ventral to the right longus coli muscle (around and into  
990 the ventral fascia) and into the longus coli immediately dorsal to the presumed ventral fascia, at  
991 the level of the C6 anterior tubercle (landmarks for the stellate ganglion; active study  
992 medication) or 1-2 mL preservative free normal saline injected anterolateral to the anterior  
993 tubercle of C6 (sham procedure). The treating physician will access participant assignment  
994 (performed at RTI per protocol) via email from RTI's central office. The participant will not be  
995 informed which treatment he or she is receiving; for blinding purposes, the same type of syringes  
996 will be used for both injections. Similarly, the same number and types of syringes and other  
997 supplies should be placed on the sterile procedure table regardless to which intervention (SGB or  
998 sham) the participant has been randomized. The interaction of the treating physician with the

999 participant will be scripted as much as possible (**Appendix 18**). Customary vital signs will be  
1000 recorded. MEDCOM 40-54 dated Feb 09 provides “a standard process and procedure for surgical  
1001 and procedural site verification of patients undergoing operative or other invasive procedures”.  
1002 In accordance with this regulation, the participant’s identity, the procedure to be performed, and  
1003 the specific site of the procedure will be verified. A separate paper CRF will be created for the  
1004 procedure; this information will not be shared with anyone outside the treatment suite (RC,  
1005 participant, other members of the RTI Project Team, etc.). It is critical that only the physician  
1006 administering the treatment (and his immediate team) be aware of the participant’s assignment to  
1007 active or sham intervention. Following the intervention, the treating physician should have no  
1008 further contact with the participant except as required for participant safety.

1009 Immediately following each SGB procedure, the subject will be observed in the procedure  
1010 suite prior to transport to the recovery area for assessment of potential complications that could  
1011 require immediate intervention, according to local clinic policy. The participant then will be  
1012 taken to the post-procedure recovery area, where monitoring of vital signs will continue under  
1013 the supervision of the recovery nurse for 20 minutes or longer, again per local clinic policy and  
1014 participant condition.

1015 The RC will assess the participant at 30 minutes post-procedure for his/her Horner’s  
1016 syndrome, recording the time post-SGB and using the following metrics (0 for absent, 1 for  
1017 slight, 2 for obvious) when the participant is sitting up straight and not facing a bright light:

- 1018 ptosis
- 1019 scleral injection
- 1020 miosis

1021 Assuming the absence of complications requiring further evaluation or treatment, the  
1022 participant will be given discharge instructions, and will be required to verbally indicate  
1023 understanding of signs and symptoms that would require emergency care (e.g., shortness of  
1024 breath or difficulty breathing, increasing neck pain). In addition, the clinic nurse will remind the  
1025 participant that soreness at the injection site, a full sensation of the throat, and Horner’s  
1026 symptomology may occur for 6-18 hours (the duration of effect of the local anesthetic); if the  
1027 recurrent laryngeal nerve has been blocked, there may also be hoarseness and difficulty  
1028 swallowing. The participant then will be allowed to leave the clinic per local site policy.

#### 1029 **6.4. Post-Treatment Assessments (Weeks 4, 6, and 8)**

1030 With the exception of the final CAPS-5, it is expected that these instruments will be  
1031 completed by the participants on their own devices using a secure Web-based platform. For  
1032 analytical purposes, each follow-up period will begin 2 days before the exact date of the follow-  
1033 up and will end 11 days after the exact date of the follow-up. For example, the 2-week follow-up  
1034 period will begin on day 12 and will end on day 25, the 4-week follow-up period will begin on  
1035 day 26 and will end on day 38, etc. See **Appendix 19-1** and **19-2** for email communications,  
1036 phone reminder script and contacting schedule.

##### 1037 **6.4.1. CAPS-5**

1038 The CAPS-5 will be repeated, again via phone interview, at approximately 8 weeks  
1039 following the first SGB, in support of the primary objective.

1040 **6.4.2. PCL-5**

1041 The PCL-5 will be repeated at weeks 4, 6, and 8 in support of secondary objective 1.

1042 **6.4.3. PCL-C**

1043 The PCL-C will be repeated at weeks 4, 6, and 8 in support of secondary objective 1.

1044 **6.4.4. M.I.N.I.-Plus Suicidality Items**

1045 The M.I.N.I.-Plus Suicidality Items will be repeated at weeks 4, 6, and 8, and is intended to  
1046 enhance participant safety and support secondary objective 3. In most cases these assessments  
1047 will take place via a secure web portal on the participant's device of choice (i.e., there will be no  
1048 interaction between the participant and the RC at these times). If an individual affirmatively on  
1049 any of the first seven M.I.N.I.-Plus items regarding suicidal ideation in the previous 2 months,  
1050 they will be asked an additional 4 questions regarding *current* suicidal ideation or plans. If a  
1051 participant answers affirmatively to currently wanting to harm themselves, thinking about  
1052 committing suicide, having a plan, or planning to act on a plan, an automated participant safety  
1053 system will be triggered (see [Section 6.4.13](#)).

1054 **6.4.5. AUDIT-C/AUDIT**

1055 The AUDIT-C and, if the participant screens positive, the full AUDIT, will be repeated at  
1056 weeks 4 and 8 in support of secondary objective 3.

1057 **6.4.6. K6**

1058 The K6 will be repeated at weeks 4, 6, and 8 in support of secondary objective 3.

1059 **6.4.7. PHQ-9**

1060 The PHQ-9 will be repeated at weeks 4 and 8 in support of secondary objective 3.

1061 **6.4.8. GAD-7**

1062 The GAD-7 will be repeated at weeks 4 and 8 in support of secondary objective 3.

1063 **6.4.9. SF-12**

1064 The SF-12 will be repeated at weeks 4 and 8 in support of secondary objective 4.

1065 **6.4.10. Short Pain Scale**

1066 The short pain scale will be repeated at weeks 4 and 8 in support of secondary objective 3.

1067 **6.4.11. Current Medications**

1068 Current medications will be reassessed at weeks 4 and 8 in support of secondary objective 2.

1069 **6.4.12. Additional Questions**

1070 Additional questions will be asked of study participants at follow-up time points as follows.

1071 *Subjective Assessment of Change.* For purposes of stratifying participants for qualitative  
1072 analysis (see [Section 3.2](#)), we will ask participants overall how they are feeling at 2, 4, 6, and 8  
1073 weeks post initial treatment compared to how they were feeling before having the procedure.  
1074 Response options will be categorical.

1075 *Subjective Assessment of Treatment Group.* At week 4, in order to analyze participants'  
1076 beliefs regarding whether they were randomized to the study's active or sham treatment arm (in  
1077 support of secondary objective 2), we will ask participants whether they believe they received an  
1078 "active" procedure or an "imitation" procedure.

#### 1079 **6.4.13. Managing Distressed Participants during Automated Assessments**

1080 Ensuring the well-being of study participants is of paramount importance, particularly when  
1081 utilizing web-based self-assessments to monitor PTSD symptoms and suicidal ideation. Our  
1082 web-based system will have the capability to send messages to the participant and to key study  
1083 staff in the event that a participant indicates a clinically significant risk of suicide. If an  
1084 individual answers "yes" to any of the initial seven questions concerning suicidal ideation in the  
1085 past two months, they then will be asked an additional 4 questions regarding *current* suicidal  
1086 ideation or plans. If a participant answers affirmatively to currently wanting to harm themselves,  
1087 thinking about committing suicide, have a plan, or are planning to act on a plan, an automated  
1088 system will be triggered with the following results:

- 1089 • A message will be displayed on the participant's screen that says the following:  
1090 "Given your responses to some of these questions, we are concerned about your safety.  
1091 As you were told when you signed your consent form to participate in this study, we are  
1092 contacting your Command in an effort to make sure that you are safe. We would like for  
1093 you to please go to your nearest Emergency Room for assistance. In addition, please  
1094 click below to indicate that you agree not to harm yourself before you get to the  
1095 Emergency Room."
  - 1096 • A text message providing the service member's name and his/her command contact  
1097 information (name, telephone number, and email) will be generated and sent to the  
1098 following RTI staff:
    - 1099 – The RC at the site
    - 1100 – Kristine Rae Olmsted (KRO)
    - 1101 – Russ Vandermass-Peeler (RVP)
  - 1102 • RTI staff will contact the participant's command by first calling the CQ/duty phone  
1103 number. If that is unsuccessful, they will contact the participant's First Sergeant or  
1104 Commanding Officer.
    - 1105 – The RC will be the first level responder, since he/she is local
    - 1106 – If the RC doesn't respond in 2 hours, KRO and RVP will respond.
  - 1107 • Per site policy, Behavioral Health will be notified by the following business day.

### 1108 **6.5. Acceptability Study Procedures**

#### 1109 **6.5.1. Participant Recruitment and Group Assignment**

##### 1110 *6.5.1.1. Service Members*

##### 1111 *Clinical Effectiveness Trial Participants*

1112 All service members enrolled in the trial will be eligible for the qualitative study if they  
1113 have received at least one SGB study procedure during the three months prior to qualitative data



1114 collection and if participation would not cause undue distress, as described below. During  
1115 Baseline Assessment, the RC will describe the qualitative study, following the recruitment script  
1116 included in **Appendix 19-3** and providing the Fact Sheet included as **Appendix 19-4**. The RC  
1117 will keep a list of all service members who indicate willingness to participate in the qualitative  
1118 study. Recruitment for actual qualitative data collection will be determined by the pace of  
1119 accrual into the clinical trial. When qualitative data collection is scheduled, the RC will draw on  
1120 this list to invite service members to participate in the qualitative study, either in the course of a  
1121 follow-up visit or by email, following the scripts included as **Appendix 19-12**. Service members  
1122 will not be contacted for qualitative study participation if the RC or treating provider considers  
1123 that participation would cause undue distress based on their most recent contact with the  
1124 individual.

#### 1125 *Other Service Members*

1126 Service members who did not participate in the clinical trial are eligible for the  
1127 qualitative study if they have received at least one SGB for PTSD symptoms at a study site in the  
1128 3 months prior to qualitative data collection and if participation would not cause undue distress  
1129 as described above. These participants will be recruited in the clinic as well as through a medical  
1130 record search conducted by the Site PI or other clinical staff.

1131 The RCs or clinic staff will identify individuals coming into the clinic for an SGB who may  
1132 be good candidates for participation in the qualitative study. Once at the clinic, the RC or clinical  
1133 staff will briefly explain the study to patients using the scripts included in **Appendix 19-3**. If the  
1134 service member is interested in participating, then the RC will screen the individual at that time  
1135 or contact them later and provide the Fact Sheet included as **Appendix 19-4**. If the individual  
1136 prefers, he/she can also email the RC later to indicate interest.

1137 Additionally, site PI or clinic staff at the three study sites will review clinic records to  
1138 identify those patients who have come in for an SGB in the three months prior to qualitative data  
1139 collection. This list will be securely stored in a locked cabinet and securely shredded when  
1140 recruitment for the qualitative has been completed. The PI, clinic staff, or RCs will contact  
1141 potentially eligible individuals by phone or e-mail to see if they are interested in the qualitative  
1142 study following the recruitment script included in **Appendix 19-3**. Potentially eligible individuals will receive  
1143 up to 2 e-mails and 2 phone calls regarding the study. E-mail contact will refer only to SGB and will not mention  
1144 PTSD symptoms. This will ensure confidentiality of the potential participant in the event that the contact is seen by someone other than  
1145 the intended recipient. Phone contacts will confirm potential participant identity prior to providing any information regarding the study.

1146 if the service member is interested in participating, then the RC will speak with the  
1147 individual at that time or contact them later and provide the Fact Sheet included as **Appendix 19-**  
1148 **4**. If the individual prefers, he/she can also contact the RC later to indicate interest.

#### 1149 *Group Assignment*

1150 Assignment to specific focus groups will be based on pay grade and subjective assessment  
1151 of change as reported at the 4 Week assessment or at the time of screening for the qualitative  
1152 study. In order to maximize homogeneity, lower enlisted service members and NCOs will be  
1153 assigned to different groups. These groups will be further divided so that those reporting positive  
1154 change since the procedure will be assigned to a different group than those reporting no change  
1155 or feeling worse than at the time of the procedure. Depending on the number of eligible  
1156 participants by pay grade, officers may be interviewed individually.

1157 *6.5.1.2. Service Member/Spouse Dyads*

1158 Eligible participants will be service members who meet the above criteria and whose spouse  
1159 has expressed interest in participating in the qualitative study. Joint interview participants will  
1160 not be allowed to also participate in focus groups. For service members who have indicated an  
1161 interest in participating in focus groups, the RC will identify marital status from participants'  
1162 demographic data or by asking the participant and inquire whether the service member's spouse  
1163 is currently living with him/her. If so, the RC will offer these service members a recruitment Fact  
1164 Sheet (**Appendix 19-5**) for the joint interviews. Interested spouses will contact the RC, who will  
1165 use the recruitment script (**Appendix 19-6**) to describe the study and confirm interest. The RC  
1166 will invite service members and spouses by email (again including the Fact Sheet) or phone to  
1167 participate in a dyadic interview.

1168 Participants in joint interviews will include lower enlisted and NCOs, and service members  
1169 will be stratified by whether they report positive versus neutral or negative change since the  
1170 procedure.

1171 *6.5.1.3. Providers*

1172 Eligible participants for the provider focus groups will be Behavioral Health or other (e.g.,  
1173 Family Medicine) clinicians who have referred or could potentially refer service members for  
1174 SGB for PTSD symptoms, as well as physicians who provide SGBs. The RC will identify  
1175 eligible clinicians in consultation with the site PIs and study records. These individuals will be  
1176 invited to participate in a small focus group through an email sent by the site PI or RC. Sample  
1177 text for this email is included in **Appendix 19-7**. A Fact Sheet describing the study will be  
1178 attached to this email, included as **Appendix 19-8**.

1179 **6.5.2. Data Collection**

1180 Focus group interviews are planned; these are structured discussions on a particular topic  
1181 involving a small number of people under the direction of a moderator (Krueger & Casey, 2000).  
1182 The method relies on both the interactive social context of the discussion and on the individual  
1183 experiences of each of the group members to produce a rich discussion in which shared  
1184 experiences stimulate individual contributions. A methodological review by Polak and Green  
1185 (2015) notes that joint interviews in which couples who are interviewed together offer similar  
1186 advantages, with the opportunity for individuals to support and prompt each other, and offer  
1187 contrasting perspectives on shared events. The authors further note that interviews have been  
1188 found particularly useful in describing health-related decision-making.

1189 The qualitative study will explore participants' perceptions of SGB in relation to other  
1190 options for treatment of PTSD, from the perspectives of service members, service  
1191 member/spouse couples, and providers. Broad topics covered in service member focus groups,  
1192 service members/spouse interviews, and provider focus group are compared in in **Table 3**. The  
1193 topic guide for service member focus groups is included as **Appendix 19-9**, for service member  
1194 and spouse interviews as **Appendix 19-10**, and for provider focus groups as **Appendix 19-11**. If  
1195 it is necessary to interview officers individually, questions will follow those in the service  
1196 members topic guide. We anticipate that focus groups and small group interviews will take  
1197 approximately 90 minutes, service member-significant other interviews will take approximately  
1198 60 minutes, and individual interviews will take approximately 45 minutes.

1199 **Table 3. Topics Addressed in Focus Groups and Interviews**

| Topic                                         | Service Members | Service Member/<br>Spouse Couple | Provider |
|-----------------------------------------------|-----------------|----------------------------------|----------|
| Context for mental health and treatment       | •               | •                                |          |
| Advantages and drawbacks of treatment options | •               | •                                | •        |
| Information and decision-making               | •               | •                                | •        |
| Experience and expectations                   | •               | •                                |          |

1200  
1201 All focus groups and interviews will be led by a study team member with prior experience  
1202 in qualitative data collection with clinicians and service members engaged in mental health  
1203 treatment. Real-time notes will be collected by a second team member. We will also audio-  
1204 record each focus group or interview, if all participants give permission to do so. The purpose of  
1205 the audio recordings is to augment any notes taken by the second team member (for instance, if  
1206 the note-taker misses something said by a group participant, they may need to consult the audio  
1207 recordings to clarify). We will use a digital recorder for this purpose, with each session’s file  
1208 transferred to an encrypted laptop immediately after the session, then deleted from the digital  
1209 recorder. Participants will not be personally identified in these notes, but will instead be  
1210 indicated generically, such as “Respondent 1” or “Respondent 2.”

1211 Data from focus groups and interviews will be summarized in topline notes as soon as  
1212 feasible after data collection. In-depth analysis will employ standard qualitative methods. All  
1213 notes will be entered into qualitative data base software such as NVivo 9 (QSR International Pty  
1214 Ltd. Version 9, 2010) to facilitate coding and retrieval. Analysis will be both deductive,  
1215 following a hierarchical coding structure based on topic guide questions, and inductive, creating  
1216 queries to assess patterns observed in the data and hypotheses emerging from preliminary  
1217 analyses. We will also construct analytic matrixes to compare responses across respondent types.  
1218 Comparisons of interest include:

- 1219 • Enlisted, NCO, officer
- 1220 • Service member, spouse
- 1221 • Service member, provider
- 1222 • Self-assessed improvement, no self-assessed improvement
- 1223 • Behavioral Health clinicians, Family Medicine physicians
- 1224 • Study sites

1225 **6.5.3. Managing Distressed Participants During Data Collection**

1226 Discussion of PTSD treatment experiences may be distressing to participants. We will  
1227 remind all participants of counseling resources available to them if they wish to discuss further  
1228 any issue addressed or suggested by the focus group. Contact information for the installation’s  
1229 chaplain services, Behavioral Health services, and substance abuse services, as well as Military  
1230 OneSource, will be attached to each participant’s copy of the informed consent forms. In  
1231 addition, research team members will have contact information for the clinical staff available

1232 during and immediately after each of the focus groups. These providers will be contacted  
1233 immediately if any participants' behavior raises concerns that they will harm themselves or  
1234 another person. Study staff will also have contact information for installation Military Police to  
1235 be used in the event of any urgent threat to safety.

#### 1236 **6.6. Assessments for Premature Discontinuation from Study**

1237 The study is designed as intention-to-treat, and therefore participants will not be excluded  
1238 after randomization. If a participant discontinues further treatment or participation in the study,  
1239 for example as a result of an adverse event (AE, [Section 7](#)), every attempt should be made to  
1240 continue to perform the required study-related follow-up and procedures (see [Section 6.7](#),  
1241 Criteria for Suspension of Study Treatment). If this is not possible or acceptable to the  
1242 participant or Investigator, the participant may be withdrawn from the study.

#### 1243 **6.7. Criteria for Suspension of Study Treatment**

1244 Study intervention may be discontinued in the following instances:

- 1245 • Intercurrent illness that would, in the judgment of the Investigator, affect assessments of  
1246 clinical status to a significant degree.
- 1247 • Unacceptable toxicity that compromises the ability to continue study-specific  
1248 procedures, or is considered to not be in the participant's best interest.
- 1249 • Participant request to discontinue for any reason.
- 1250 • Participant non-compliance.
- 1251 • Pregnancy during the first two weeks of the study, when study-related treatment  
1252 procedures (either active or sham) are being conducted.
- 1253 • Discontinuation of the study at the request of the relevant IRB.

## 1254 **7. ADVERSE EVENTS AND DEVIATION MANAGEMENT**

### 1255 **7.1. Research Monitor**

1256 This trial is not a safety study; SGB is a well-studied procedure with a low probability of  
1257 serious adverse events (Wulf & Maier, 1992), and a smaller volume of saline injected  
1258 superficially to the region of the SG would be expected to result in even fewer serious adverse  
1259 events. Nevertheless, reports of adverse events will be collected during the trial, and the  
1260 Research Monitor is required to review all unanticipated problems involving risk to volunteers or  
1261 others, Serious Adverse Events (SAE) and all volunteer deaths associated with the protocol and  
1262 provide an unbiased written report of the event. At a minimum the Research Monitor should  
1263 comment on the outcomes of the event or problem and in the case of a SAE or death comment on  
1264 the relationship to participation in the study. The Research Monitor should also indicate whether  
1265 he/she concurs with the details of the report provided by the Study Investigator. All  
1266 unanticipated problems involving risk to subjects or others will be promptly reported to the  
1267 USAMRMC Office of Research Protection (ORP) Human Research Protection Office (HRPO)  
1268 by telephone (301-619-2165), by email ([usarmc.other.hrpo-  
1269 usarmc.other.hrpo@mail.mil](mailto:usarmc.other.hrpo@mail.mil)), or by facsimile (301-619-7803) or mail to the US Army Medical  
1270 Research and Materiel Command, ATTN: MCMR-RP, 810 Schreider Street, Fort Detrick,  
1271 Maryland 21702-5000.

1272 At a minimum, the Research Monitor may discuss the research protocol with the  
1273 Investigators, interview the participants, observe study interventions, and consult with others  
1274 outside of the study about the research. The Research Monitor has the authority to stop this trial,  
1275 remove individual participants from the protocol, and take whatever steps are necessary to  
1276 protect the safety and well-being of human subjects until the IRB can assess the Monitor's  
1277 report. It is the Research Monitor's responsibility to promptly report their observations and  
1278 finding to the IRB. There should be no conflict of interest for the Monitor, and the Monitor  
1279 cannot be under the supervision of the PI or other Investigators or research staff. If the duties of  
1280 the Research Monitor could require disclosure of participants' Protected Health Information  
1281 outside a covered entity (i.e., the Monitor is not an agent of the covered entity), the institution  
1282 responsible for the protection of human subjects may require the identity and location of the  
1283 Research Monitor to be described in the study Health Information Portability and Accountability  
1284 Act authorization.

### 1285 **7.2. Adverse Events**

1286 An adverse event (AE) is any untoward medical occurrence in a clinical investigation  
1287 participant administered a medicinal product and which does not necessarily have a causal  
1288 relationship with this treatment. An AE can therefore be any unfavorable and unintended sign,  
1289 symptom, or disease temporally associated with the use of a medicinal product, whether or not  
1290 considered related to the medicinal product. AEs may also include pre- or post-treatment  
1291 complications that occur as a result of protocol-mandated procedures (e.g. invasive procedures  
1292 such as venipuncture, biopsy, etc.). Pre-existing events which increase in severity or change in  
1293 nature during or as a consequence of use of a medicinal product in human clinical trials will also  
1294 be considered AEs.

1295 Any reported medical condition or clinically significant laboratory abnormality with an  
1296 onset date before the screening visit and not related to study procedures is considered to be pre-  
1297 existing, and should be documented in the case report form.

1298 Any AE (i.e., a new event or an exacerbation of a pre-existing condition) with an onset date  
1299 after the screening visit up to the last day on study (including the follow-up, off study medication  
1300 period of the study), should be recorded as an AE on the appropriate CRF page(s).

1301 An AE does not include:

- 1302 • Medical or surgical procedures (e.g. surgery, endoscopy, tooth extraction, transfusion);  
1303 the condition that leads to the procedure is an adverse event.
- 1304 • Pre-existing diseases or conditions or laboratory abnormalities present or detected prior  
1305 to the screening visit that do not worsen.
- 1306 • Situations where an untoward medical occurrence has not occurred (e.g. hospitalization  
1307 for elective surgery, social and/or convenience admissions).
- 1308 • Overdose of either study drug or concomitant medication without any signs or  
1309 symptoms unless the participant is hospitalized for observation.

1310 The risks attributable to the trial itself originate from the sham procedure arm and include  
1311 those associated with the sham saline injection itself. These would be expected to be  
1312 significantly lower than those associated with the “active” SGB, for which “severe  
1313 complications” (e.g., seizures, epidural and subarachnoid blocks, pneumothorax, allergic  
1314 reactions) have been reported to be 0.17% (Wulf & Maier, 1992). It is also possible that  
1315 participants may learn inadvertently the intervention group to which they were randomized, and  
1316 that those who learn they were randomized to a sham procedure may react negatively to this  
1317 information. These individuals may present to their regular health care provider(s), the  
1318 Department of Behavioral Health, their local emergency department, or other relevant resources  
1319 should they wish.

1320 Unanticipated problems involving risk to volunteers or others, SAE related to participation  
1321 in the study and all volunteer deaths related to participation in the study should be promptly  
1322 reported to the HRPO by telephone (301-619-2165), by e-mail (usarmy.detrick.medcom-  
1323 usamrmc.other.hrpo@mail.mil), by facsimile (301-619-7803), or by mail to the U.S. Army  
1324 Medical Research and Materiel Command, ATTN: MCMR-RP, 810 Schreider Street, Fort  
1325 Detrick, Maryland 21702-5000. The Research Monitor also should be promptly informed.

### 1326 **7.3. Assessment of Adverse Events**

1327 All AEs will be assessed by the investigator and recorded on the appropriate CRF page,  
1328 including the date of onset and resolution, severity, relationship to study drug or study  
1329 procedures, outcome and action taken with study medication.

1330 The relationship to study drug therapy or study procedures should be assessed using the  
1331 following definitions:

- 1332 • **Definitely Not Related:** The participant did not receive the study drug and/or study  
1333 procedure, the temporal sequence of the AE/SAE onset relative to administration of the

1334 study drug or performance of the procedure is not reasonable, or there is another obvious  
1335 cause of the AE/SAE.

1336 • **Possibly Related:** There is evidence of exposure to the study drug and/or study  
1337 procedure, the temporal sequence of the AE/SAE onset relative to administration of the  
1338 study drug or performance of the procedure is reasonable, but the AE/SAE could have  
1339 been due to another cause.

1340 • **Definitely Related:** There is evidence of exposure to the study drug and/or study  
1341 procedure, the temporal sequence of the AE/SAE onset relative to administration of the  
1342 study drug and/or study procedure is reasonable, the AE/SAE is more likely explained  
1343 by the study drug and/or study procedure than by any other cause, and the AE/SAE  
1344 shows a pattern consistent with previous knowledge of the study drug or study drug  
1345 class and/or the study procedure.

1346 These criteria in addition to good clinical judgment should be used as a guide for  
1347 determining the causal assessment. If it is felt that the event is not related to study drug therapy,  
1348 then an alternative explanation should be provided.

#### 1349 **7.4. Adverse Event Reporting Requirements**

1350 AE reports (including SAE reports, [Section 7.5](#)) will be included in the continuing review  
1351 reports and in the regularly scheduled re-approval applications to the IRB of record.

#### 1352 **7.5. Serious Adverse Events**

1353 A **serious adverse event** (SAE) is defined as follows:

- 1354 • Any adverse drug experience occurring at any dose that results in any of the following  
1355 outcomes:
  - 1356 ○ Death;
  - 1357 ○ Life-threatening situation (subject is at **immediate** risk of death);
  - 1358 ○ In-patient hospitalization or prolongation of existing hospitalization (excluding  
1359 those for study therapy or placement of an indwelling catheter, unless associated  
1360 with other serious events);
  - 1361 ○ Persistent or significant disability/incapacity;
  - 1362 ○ Congenital anomaly/birth defect in the offspring of a subject who received study  
1363 drug;
  - 1364 ○ Other: medically significant events that may not result in death, be immediately  
1365 life-threatening, or require hospitalization, may be considered a SAE when, based  
1366 upon appropriate medical judgment, they may jeopardize the subject and may  
1367 require medical or surgical intervention to prevent one of the outcomes listed in  
1368 this definition.

1369 Examples of such events are:

- 1370 • Intensive treatment in an emergency room or at home for allergic bronchospasm
- 1371 • Blood dyscrasias or convulsions that do not result in hospitalization

- 1372           • Development of drug dependency or drug abuse

1373           Clarification of Serious Adverse Events

- 1374           • Death is an outcome of an adverse event, and not an adverse event in itself. In reports of  
1375           death due to “Disease Progression,” where no other information is provided, the death  
1376           will be assumed to have resulted from progression of the disease being treated with the  
1377           study drug(s).

- 1378           • All deaths, regardless of cause or relationship, must be reported for subjects on study  
1379           and for deaths occurring within 30 days of last study drug dose or within 30 days of last  
1380           study evaluation, whichever is longer.

- 1381           • “Occurring at any dose” does not imply that the subject is receiving study drug at the  
1382           time of the event. Dosing may have been given as treatment cycles or interrupted  
1383           temporarily prior to the onset of the SAE, but may have contributed to the event.

- 1384           • “Life-threatening” means that the subject was at immediate risk of death from the event  
1385           as it occurred. This does not include an event that might have led to death, if it had  
1386           occurred with greater severity.

- 1387           • Complications that occur during hospitalizations are AEs. If a complication prolongs  
1388           hospitalization, it is a SAE.

- 1389           • “In-patient hospitalization” means the subject has been formally admitted to a hospital  
1390           for medical reasons, for any length of time. This may or may not be overnight. It does  
1391           not include presentation and care within an emergency department.

- 1392           • The investigator should attempt to establish a diagnosis of the event based on signs,  
1393           symptoms and/or other clinical information. In such cases, the diagnosis should be  
1394           documented as the AE and/or SAE and not the individual signs/symptoms.

1395           A distinction should be drawn between serious and severe AEs. An AE that is assessed as  
1396           grade 4 (potentially life-threatening) should not be confused with a SAE. Severity is a category  
1397           utilized for rating the intensity of an event; and both AEs and SAEs can be assessed as grade 4.  
1398           An event is defined as ‘serious’ when it meets one of the pre-defined outcomes as described  
1399           above.

1400           **7.6. Serious Adverse Event Reporting Requirements**

1401           **7.6.1. All Serious Adverse Events**

1402           RTI International, the Research Monitor, and HRPO must be notified immediately regarding  
1403           the occurrence of any unanticipated and/or serious adverse event that occurs after the screening  
1404           visit, including serious adverse events resulting from study procedures performed from screening  
1405           onwards. The procedures for reporting all serious adverse events, regardless of causal  
1406           relationship, are as follows:

- 1407           • Record the unanticipated and/or SAE on the AE CRF and complete the “Serious Adverse  
1408           Event Report” form.



- 1409           – Fax and email the serious adverse event report to the attention of RTI International  
1410           and HRPO within 24 hours of the investigator’s knowledge of the event. Contact  
1411           information is below.
- 1412           – For fatal or life-threatening events, also fax and email copies of hospital case reports,  
1413           autopsy reports, and other documents when requested and applicable.

RTI International Principal Investigator:   Name: Bradford B. Walters MD, PhD  
                                                          Title Chief Medical Officer  
                                                          Phone: 919-316-3509  
                                                          Mobile Phone: 919-614-6273  
                                                          Email: [bwalters@rti.org](mailto:bwalters@rti.org)

RTI International Co-Investigator:       Name: Kristine Rae Olmsted  
                                                          Phone: 919-541-8035  
                                                          Mobile Phone: 919-632-4079  
                                                          Fax: 919-485-5555  
                                                          Email: [krolmsted@rti.org](mailto:krolmsted@rti.org)

HRPO:                                            Phone: 301-619-2165  
                                                          Fax : 301-619-7803  
                                                          Email: [usarmy.detrick.medcom-usarmmc.other.hrpo@mail.mil](mailto:usarmy.detrick.medcom-usarmmc.other.hrpo@mail.mil)

Research Monitor:                            Name: MAJ Samuel Blacker MD  
                                                          Phone : 910-907-7318  
                                                          Fax : 910-907-8570  
                                                          Pager : 301-957-0958  
                                                          Email : [samuel.n.blacker.mil@mail.mil](mailto:samuel.n.blacker.mil@mail.mil)

1414           RTI International may request additional information from the Investigator to ensure the  
1415           timely completion of accurate safety reports.

1416           The Investigator must take all therapeutic measures necessary for resolution of the SAE.  
1417           Any medications necessary for treatment of the SAE must be recorded onto the concomitant  
1418           medication section of the participant’s CRF.

1419           Follow-up of adverse events will continue through the last day on study (including the  
1420           follow-up, off study medication period of the study), until the Investigator and/or RTI  
1421           International determine that the participant’s condition is stable, or up to 30 days after the last  
1422           dose of study drug, whichever is longer. RTI International may request that certain adverse  
1423           events be followed until resolution.

#### 1424           **7.6.2. Investigator Reporting Requirements for SAEs**

1425           The Investigator should notify the Institutional Review Board (IRB) or Independent Ethics  
1426           Committee (IEC) as soon as is practical of serious events in writing where this is required by  
1427           local regulatory authorities, and in accordance with the local institutional policy.

1428 **7.6.3. Post Study Reporting Requirements**

1429 All deaths, regardless of cause or relationship, must be reported to RTI for  
1430 participants on study and for all deaths occurring within 30 days of last study drug  
1431 dose. Protocol Deviation Reporting Requirements

1432 Any deviation from this protocol that may have an effect on the safety or rights of the  
1433 volunteer or the integrity of the study must be promptly reported to RTI and the IRB. Any  
1434 corrective actions taken to avoid future such deviations should be included in the report.  
1435 Documentation of any actions taken by the IRB related to the deviation report should be  
1436 provided when available.

1437 **7.7. Clinical Laboratory Abnormalities and Other Abnormal Assessments as**  
1438 **Adverse Events or Serious Adverse Events**

1439 Laboratory abnormalities are usually not recorded as adverse events or serious adverse  
1440 events unless they are associated with clinical signs and/or symptoms. However, laboratory  
1441 abnormalities (e.g. clinical chemistry, hematology, urinalysis, etc.) independent from the  
1442 underlying medical condition, that require medical or surgical intervention, or lead to study drug  
1443 interruption or discontinuation must be recorded as an AE, as well as an SAE, if applicable. In  
1444 addition, laboratory or other abnormal assessments (e.g. electrocardiogram, X-rays, vital signs)  
1445 that are associated with signs and/or symptoms must be recorded as an AE or SAE if they meet  
1446 the definition of an adverse event (or serious adverse event) as described in [Sections 7.1](#) and [7.3](#).  
1447 If the laboratory abnormality is part of a syndrome, record the syndrome or diagnosis.

1448 Severity should be recorded and graded according to the Common Terminology Criteria for  
1449 Adverse Events (CTCAE) version 4.03. For adverse events associated with laboratory  
1450 abnormalities, the event should be graded based on the clinical severity in the context of the  
1451 underlying conditions, which may or may not be in agreement with the grading of the laboratory  
1452 abnormality.

1453 **7.8. Risks for Women of Childbearing Potential or during Pregnancy**

1454 The FDA classes ropivacaine as Pregnancy Category B, and pregnant women are not to be  
1455 enrolled in this trial. The participant must be instructed to discontinue all study drugs and inform  
1456 the investigator **immediately** if she becomes pregnant during the study.

1457 The investigator should report all pregnancies to RTI International within 24 hours of  
1458 becoming aware of the pregnancy. The investigator should counsel the participant regarding the  
1459 possible effects of prior study drug exposure on the fetus and the need to inform the study site of  
1460 the outcome of the pregnancy.

1461 Any pregnancy complication or elective termination of a pregnancy for medical reasons will  
1462 be recorded as an AE or a SAE.

1463 A spontaneous abortion is always considered to be a SAE and will be reported as described  
1464 in the adverse and Serious Adverse Events section. Furthermore, any SAE occurring as an  
1465 adverse pregnancy outcome post-study must be reported to RTI International.

1466 **7.9. HRPO Reporting Requirements**

1467 a. Substantive modifications to the research protocol and any modifications that could  
1468 potentially increase risk to subjects must be submitted to the HRPO for approval prior to  
1469 implementation. The USAMRMC ORP HRPO defines a substantive modification as a change in  
1470 Principal Investigator, change or addition of an institution, change to the IRB of Record,  
1471 elimination or alteration of the consent process, change to the study population that has  
1472 regulatory implications (e.g. adding children, adding active duty population, etc.), significant  
1473 change in study design (i.e. would prompt additional scientific review), or a change that could  
1474 potentially increase risks to subjects.

1475 b. A copy of the IRB continuing review approval letter must be submitted to the HRPO as  
1476 soon as possible after receipt of approval.

1477 c. The final study report submitted to the IRB, including a copy of any acknowledgement  
1478 documentation and any supporting documents, must be submitted to the HRPO as soon as all  
1479 documents become available.

1480 d. The following study events must be promptly reported to the HRPO by telephone  
1481 (301-619-2165), by email ([usarmy.detrick.medcom-usamrmc.other.hrpo@mail.mil](mailto:usarmy.detrick.medcom-usamrmc.other.hrpo@mail.mil)), or by  
1482 facsimile (301-619-7803) or mail to the US Army Medical Research and Materiel Command,  
1483 ATTN: MCMR-RP, 810 Schreider Street, Fort Detrick, Maryland 21702-5000.

1484 (1) All unanticipated problems involving risk to subjects or others.

1485 (2) Suspensions, clinical holds (voluntary or involuntary), or terminations of this research  
1486 by the IRB, the institution, the sponsor, or regulatory agencies.

1487 (3) Any instances of serious or continuing noncompliance with the federal regulations or  
1488 IRB requirements.

1489 (4) The knowledge of any pending compliance inspection/visit by the Food and Drug  
1490 Administration (FDA), Office for Human Research Protections, or other government agency  
1491 concerning this clinical investigation or research.

1492 (5) The issuance of inspection reports, FDA Form 483, warning letters, or actions taken  
1493 by any government regulatory agencies.

1494 (6) Change in subject status when a previously enrolled human subject becomes a  
1495 prisoner must be promptly reported to the USAMRMC ORP HRPO. The report must include  
1496 actions taken by the institution and the IRB.

1497 e. Events or protocol reports received by the HRPO that do not meet reporting requirements  
1498 identified within this memorandum will be included in the HRPO study file but will not be  
1499 acknowledged

## 1500 **8. STATISTICAL CONSIDERATIONS**

### 1501 **8.1. Primary Analysis**

1502 Data analysis will be performed according to the intent-to-treat principle. The primary  
1503 outcome of this study (difference in CAPS-5 total syndrome score from baseline) will be tested  
1504 for differences between arms. The primary outcome will be analyzed using a linear model for  
1505 continuous variable that accounts for treatment assignment, site and other factors. Adjusted  
1506 estimates of the difference in the change between the two arms and corresponding 95%  
1507 confidence intervals will be produced.

### 1508 **8.2. Secondary Analysis**

1509 The treatment effect on the clinical criteria of PTSD as measured by the PCL-5 over time  
1510 will be assessed at weeks 2, 4, 6 and 8 using a generalized-linear mixed model to account for  
1511 temporal correlation between weekly measures and the clustering of the data; this model will  
1512 control for treatment, week, site, baseline PCL-5 score and the two way interaction between  
1513 treatment and time. The outcome variable will be a binary variable denoting positive diagnosis.  
1514 Because the psychometric properties of this instrument are still under development, details of the  
1515 cut point definitions will be described more fully in the Statistical Analysis Plan (SAP), based on  
1516 either published results of those psychometric studies currently ongoing, or preliminary  
1517 psychometric analyses of data from this study, as deemed most appropriate when the SAP is  
1518 developed. Adjusted and unadjusted probabilities of benefit of treatment at each time point will  
1519 be produced using contingency table analysis (log-likelihood chi-square) and generalized-mixed  
1520 models, correspondingly.

1521 Effects of treatment on individual items from the PCL-5 through time will be evaluated  
1522 descriptively using shift tables and shift frames. Details of these descriptive analyses will be  
1523 included in the SAP.

1524 Treatment effect in the improvement or reduction of relevant health and psychological status  
1525 information such as suicidal thoughts (M.I.N.I.-Plus Suicidality), psychological distress (K6),  
1526 anxiety disorders (GAD-7), depression (PHQ-9) and pain (short pain scale) will be analyzed  
1527 using similar modeling techniques with either linear mixed models or generalized models used  
1528 appropriately for the structure of the outcome measure (continuous, binary, ordinal, nominal).  
1529 Each model will incorporate treatment, baseline measure, site, and time as categorical variables  
1530 and two-way interactions between treatment and time and appropriate confounding variables.  
1531 Models exploring change through time will account for the repeated measures (longitudinal) and  
1532 clustering effects (participants). Models evaluating the different scores at different time points  
1533 will account for the site effect, baseline measure and concomitant variables and comorbidities  
1534 relevant to the different outcomes.

1535 Similarly, improvement in physical and mental composite measures (SF-12) due to  
1536 treatment effect will be analyzed using linear mixed models at each time point, or comparing the  
1537 scores at different time points. As before, the effects will be adjusted by corresponding baseline  
1538 measure, site, and concomitant variables and comorbidities relevant to these measures.

1539 Another secondary analysis of interest is to determine the efficacy of the SGB among the  
1540 participants for whom the stellate ganglion was anesthetized effectively. The population that will

1541 be utilized for this analysis will be defined as the “Horner’s responder population.” The analytic  
1542 approach will mirror that for the primary analysis but will utilize only Horner’s responders from  
1543 the active treatment arm, with propensity scores as described in the SAP to select the appropriate  
1544 sub-population among the control arm participants.

### 1545 **8.3. Power and Sample Size**

1546 Because the proposal for the current study was written before the publication of the DSM-5,  
1547 we initially based sample size estimates on known characteristics of the CAPS related to the  
1548 DSM-IV. Weathers et al. (2001) indicate that a minimum clinically significant change in the  
1549 prior version of CAPS total symptom score was 15, and data available from multiple PTSD trials  
1550 in both civilian and military populations indicate that a reasonable conservative estimate of post-  
1551 treatment standard deviation in CAPS-IV total symptom score was 25. Based on these  
1552 assumptions, a study of 240 participants randomized at a 2:1 ratio of active treatment to sham  
1553 will provide a power of 0.99 to detect a minimal clinically important difference of 15 in the  
1554 CAPS-IV total symptom score between active and sham intervention participants with a Type I  
1555 error rate of 0.05. Because this effect size doesn’t account for a placebo effect, we also examined  
1556 the power of a study of this size to detect a 10-point difference in the two arms, and the proposed  
1557 study will have a power of 0.83 to detect that effect, indicating that the study is statistically  
1558 feasible across the three study sites.

1559 As of February 2017, new psychometric data have become available regarding the CAPS-5.  
1560 Although initial psychometric properties are still being analyzed (Weathers et al., 2017),  
1561 consultants from the National Center for PTSD have suggested that 8-10 points are indicative of  
1562 clinically significant or meaningful change. We have recently communicated with Frank  
1563 Weathers, co-author of the CAPS, and he conveyed the following:

1564 *“There isn’t a well-validated change score, but most people are using somewhere around*  
1565 *8 to 10 points for the CAPS-5. They also use loss of diagnosis or moving into a lower*  
1566 *severity range as alternative indicators. In case you don’t have them, here are the*  
1567 *rationally derived CAPS-5 severity score ranges.”*

1568 Additionally, Paula Schnurr at the National Center for PTSD told us:

1569 *“We have not finalized a number but I am suggesting somewhere between 8 and 10. I*  
1570 *think 10 is probably better given the larger number of sx’s in the criteria, despite the 0-4*  
1571 *scoring on the CAPS. In our prior work with the CAPS-IV, we had defined 10 points as*  
1572 *response...”*

1573 Given this “new” information, we are establishing a 10-point (rather than 15-point) change  
1574 in CAPS score from baseline to follow-up eight weeks after stellate ganglion block as our  
1575 primary outcome measure to indicate clinically significant and meaningful decrease in PTSD  
1576 symptoms.

### 1581 **8.4. Attrition**

1582 Loss to follow-up is always a concern where statistical power is necessary for rigorous  
1583 research. In the event that we see as high as 25% attrition between our baseline and 8-week

1584 follow-up assessment, we will still have power of more than 0.88 to detect a treatment difference  
1585 of 15 in CAPS-5 total symptom score between active and sham procedure participants with a  
1586 Type I error rate of 0.05. We believe this rate of attrition is unlikely, however, given our success  
1587 in implementing similar recruitment and retention methods for a multisite RCT regarding  
1588 treatment of PTSD and depression in Army primary care, where we have seen a greater than  
1589 80% follow-up rate at 3 months, whereas the current study entails only 2 months of participation.

## 1590 **9. RESPONSIBILITIES**

### 1591 **9.1. Investigator Responsibilities**

#### 1592 **9.1.1. Good Clinical Practice**

1593 The Investigator will ensure that this study is conducted in full compliance with the  
1594 principles of the “Declaration of Helsinki” (as amended in Edinburgh, Tokyo, Venice, Hong  
1595 Kong, and South Africa), ICH guidelines, or with the laws and regulations of the country in  
1596 which the research is conducted, whichever affords the greater protection to the study  
1597 participant. Each study Investigator, as well as staff charged with the handling of confidential  
1598 study data, will be required to maintain current human subjects training affiliated with their  
1599 respective institution through the Collaborative Institutional Training Initiative (CITI).

#### 1600 **9.1.2. Institutional Review Board (IRB) Approval**

1601 This protocol and any accompanying material to be provided to the participant (such as  
1602 advertisements, participant information sheets, or descriptions of the study used to obtain  
1603 informed consent) will be submitted, by the Investigator, to an IRB. Approval from the  
1604 committee must be obtained **before** starting the study and should be documented in a letter to the  
1605 investigator specifying the protocol number, protocol version, documents reviewed, and date on  
1606 which the committee met and granted the approval.

1607 Any modifications made to the protocol after receipt of IRB approval must also be  
1608 submitted to the committee for approval prior to implementation.

#### 1609 **9.1.3. After local IRB approval, the Protocol then must be submitted to HRPO 1610 for approval, which also must be documented before enrolling of 1611 participants may begin. ’ Informed Consent**

##### 1612 *9.1.3.1. Effectiveness Clinical Trial*

1613 For the effectiveness clinical trial, it is the responsibility of the Investigator or his designee  
1614 (e.g., the Research Coordinator) to obtain written informed consent from each individual  
1615 participating in this study after adequate explanation of the aims, methods, objectives, and  
1616 potential hazards of the study and prior to undertaking any study-related procedures. The  
1617 discussion must take place in a private setting. The Investigator must utilize an IRB-approved  
1618 consent form for documenting written informed consent. A model consent form is provided in  
1619 **Appendix 20-1**. Each informed consent will be appropriately signed and dated by the participant  
1620 and the person obtaining consent; all other pages of the consent are to be initialed by the  
1621 participant, also. The informed consent form does not explicitly describe the Horner’s syndrome  
1622 evaluations to be performed by the RC; they add no risk, and we do not wish to draw attention to  
1623 this participant-observable phenomenon which may unblind the participant.

1624 During the consent process it will be made clear to potential participants that if they indicate  
1625 an intention to harm themselves or somebody else during the trial, their command will be  
1626 notified. This includes verbal indications as well as those during online assessments, should  
1627 relevant items be answered in such a way as to indicate emergent suicidal ideation. Those  
1628 indicating emergent suicidal ideation during an online assessment (Section 6.4.13) will see a  
1629 message on their screen recommending that they go to their nearest Emergency Department (ED)

1630 for assistance. These individuals will also be asked to confirm (via checking a box on the screen)  
1631 that they will not act on any suicidal thoughts before presenting to the ED.

1632 There may be potential participants referred to the study who are unable to travel to one of  
1633 the three trial sites prior to a scheduled intervention (given TAMC's catchment area is the Pacific  
1634 Basin and LRMC provides care for active duty service members throughout Europe, Africa, and  
1635 the Middle East). In those instances, an initial informed consent will be obtained via telephone  
1636 and secure digital communication (see [Section 6.1](#)) prior to the screening evaluation. In such  
1637 cases, a second physical informed consent document will be signed when the participant comes  
1638 for his or her baseline evaluation.

#### 1639 *9.1.3.2. Acceptability Study*

1640 The Fact Sheet provided to service members at baseline data collection will describe the  
1641 voluntary and confidential nature of the qualitative acceptability study. A second copy of this  
1642 document will be provided to participants when they are scheduled to take part in a focus group  
1643 or interview.

1644 At each focus group or interview, the study team will review the Informed Consent Form  
1645 with participants. The consent form for service member focus groups is included as **Appendix**  
1646 **20-2**; for service members who are interviewed individually as **Appendix 20-3**; for service  
1647 member and spouse interviews is included as **Appendix 20-4**; and for provider focus groups as  
1648 **Appendix 20-5**. Consent forms explain who we are, how participants were selected, the  
1649 voluntary nature of participation in the qualitative study, including the right not to participate, the  
1650 right to not answer specific questions, and the right to withdraw from the focus group at any time  
1651 with no consequences. The consent form also explains the time required to complete the focus  
1652 group, the nature of the topics to be discussed, the purpose of the focus group, and the protection  
1653 of confidentiality of participants. Additionally, the consent form provides contact information for  
1654 the RTI project director and RTI's Office of Research Protection in case a respondent has any  
1655 questions about the study or his or her rights as a participant.

1656 To protect confidentiality of participants who have been diagnosed with a serious mental  
1657 health condition, we are requesting a waiver of signed consent for service members. All  
1658 participants will be given a copy of the consent form to take with them if they choose. A list of  
1659 counseling resources (on-installation and Military OneSource) will be attached to participant's  
1660 copy of the consent form.

#### 1661 **9.1.4. Confidentiality**

1662 The Investigator must assure that participants' anonymity will be strictly maintained and  
1663 that their identities are protected from unauthorized parties regarding the randomized controlled  
1664 trial portion of the study. Only participant initials and an identification code (i.e., not names)  
1665 should be recorded on any form submitted to the sponsor and IRB. The Investigator must keep a  
1666 screening log showing codes, names, and addresses for all participants screened and for all  
1667 participants enrolled in the trial. Regarding the qualitative acceptability study, participants in  
1668 group settings will be provided the same assurances of anonymity and data protection from the  
1669 study staff's perspective, and we will request that those participating in group settings not reveal  
1670 the identities of any other participants. Study staff, however, cannot guarantee that participants  
1671 will keep their own participation (or that of others) confidential.



1672 *Study Files and Retention of Records.*

1673 The investigator must maintain adequate and accurate records to enable the conduct of the  
1674 study to be fully documented and the study data to be subsequently verified. These documents  
1675 should be classified into 2 separate categories (although not limited to) the following: (1)  
1676 Investigator's study file, and (2) participant clinical source documents.

1677 The Investigator's study file will contain the protocol/amendments, CRF and query forms,  
1678 IRB and governmental approval with correspondence, informed consent, drug records, staff  
1679 curriculum vitae and authorization forms, and other appropriate documents and correspondence.

1680 Participant clinical source documents (usually defined by the project in advance to record  
1681 key efficacy/safety parameters independent of the CRFs) would include (although not be limited  
1682 to) the following: participant hospital/clinic records, physician's and nurse's notes, appointment  
1683 book, original laboratory reports, electrocardiogram (ECG), electroencephalogram (EEG), X-ray,  
1684 pathology and special assessment reports, consultant letters, screening and enrollment log, etc.

1685 All clinical study documents must be retained by the Investigator and/or RTI until seven  
1686 years from the date when the financial status report is submitted. Investigators may be required  
1687 to retain documents longer if required by applicable regulatory requirements or an agreement  
1688 with RTI International. The Investigator must notify RTI International prior to destroying any  
1689 clinical study records.

1690 Should the Investigator wish to assign the study records to another party or move them to  
1691 another location, RTI International must be notified in advance.

1692 If the Investigator cannot guarantee this archiving requirement at the study site for any or all  
1693 of the documents, special arrangements must be made between the investigator and RTI  
1694 International to store these in sealed containers outside of the site so that they can be returned  
1695 sealed to the Investigator in case of an audit. Where source documents are required for the  
1696 continued care of the participant, appropriate copies should be made for storage outside of the  
1697 site.

1698 **9.1.5. Case Report Forms**

1699 For each participant enrolled in the clinical trial, a CRF must be completed and signed by  
1700 the site Principal Investigator or sub-Investigator within a reasonable time period after data  
1701 collection. This also applies to records for those participants who fail to complete the study (even  
1702 during a pre-randomization screening period if a CRF was initiated). If a participant withdraws  
1703 from the study, the reason must be noted on the CRF. If a participant is withdrawn from the  
1704 study because of a treatment-limiting adverse event, thorough efforts should be made to clearly  
1705 document the outcome.

1706 **9.1.6. Drug Accountability**

1707 The Investigator or designee (i.e., pharmacist) is responsible for ensuring adequate  
1708 accountability of administered study drug (ropivacaine or saline). This includes participant  
1709 dispensing records. The intervention CRF will document quantities administered to participants,  
1710 including lot number, date dispensed, participant identifier number, participant initials, and the  
1711 initials of the person administering the medication.

1712 All drug-associated documentation will be periodically reviewed and verified by the study  
1713 monitor over the course of the study.

#### 1714 **9.1.7. Inspections**

1715 The Investigator should understand that source documents for this trial should be made  
1716 available to appropriately qualified personnel from RTI International or its representatives, to  
1717 IRBs, or to regulatory authority or health authority inspectors.

#### 1718 **9.1.8. Protocol Compliance**

1719 The Investigator is responsible for ensuring the study is conducted in accordance with the  
1720 procedures and evaluations described in this protocol.

### 1721 **9.2. Sponsor Responsibilities**

#### 1722 **9.2.1. Protocol Modifications**

1723 Protocol modifications, except those intended to reduce immediate risk to study participants,  
1724 may be made only by RTI International. All protocol modifications must be submitted to the IRB  
1725 in accordance with local requirements. Approval must be obtained before changes can be  
1726 implemented.

#### 1727 **9.2.2. Study Report and Publications**

1728 The final study report, including any acknowledgement documentation and supporting  
1729 documents, must be submitted to HRPO when available.

1730 **With prior RTI approval**, Investigators may communicate, orally present, or publish in  
1731 scientific or other scholarly media at any time. After conclusion of the study and **without prior**  
1732 **written approval from RTI International**, Investigators in this study may communicate, orally  
1733 present, or publish in scientific journals or other scholarly media only after the following  
1734 conditions have been met:

- 1735 • the results of the study in their entirety have been publicly disclosed by or with the  
1736 consent of RTI International in an abstract, manuscript, or presentation form; or
- 1737 • the study has been completed at all study sites for at least 2 years.

1738 No such communication, presentation, or publication will include confidential information  
1739 (see [Section 9.1.4](#)).

1740 The Investigator will submit for RTI approval any proposed publication or presentation  
1741 along with the respective scientific journal or presentation forum at least 30 days prior to  
1742 submission of the publication or presentation. The Investigator will comply with RTI  
1743 International's request to delete references to its confidential information (other than the study  
1744 results) in any paper or presentation. All publications will follow appropriate industry guidelines  
1745 for determining authorship.

1746 **9.3. Joint Investigator/Sponsor Responsibilities**

1747 **9.3.1. Access to Information for Monitoring**

1748 In accordance with International Conference on Harmonisation Good Clinical Practice  
1749 (ICH-GCP) guidelines, the study monitor must have direct access to the Investigator's source  
1750 documentation in order to verify the data recorded in the CRFs for consistency.

1751 The monitor is responsible for review of the CRFs at regular intervals throughout the study,  
1752 to verify adherence to the protocol, and the completeness, consistency and accuracy of the data  
1753 being entered on them. The monitor should have access to any participant records needed to  
1754 verify the entries on the CRFs. The Investigator agrees to cooperate with the monitor to ensure  
1755 that any problems detected in the course of these monitoring visits are resolved.

1756 **9.3.2. Access to Information for Auditing or Inspections**

1757 Representatives of regulatory authorities or of RTI International may conduct inspections or  
1758 audits of the clinical study. If the Investigator is notified of an inspection by a regulatory  
1759 authority the investigator agrees to notify RTI International immediately. The Investigator agrees  
1760 to provide to representatives of a regulatory agency or RTI International access to records,  
1761 facilities, and personnel for the effective conduct of any inspection or audit.

1762 **9.3.3. Study Discontinuation**

1763 Both RTI International and the Investigator reserve the right to terminate the study at any  
1764 time. Should this be necessary, both parties will arrange discontinuation procedures and notify  
1765 the appropriate regulatory authority(ies) and IRBs. In terminating the study, RTI International  
1766 and the Investigator will assure that adequate consideration is given to the protection of the  
1767 participants' interests.

1768 **10. REFERENCES**

- 1769 Allen, J. P., Litten, R. Z., Fertig, J. B., & Babor, T. (1997). A review of research on the Alcohol  
1770 Use Disorders Identification Test (AUDIT). *Alcoholism: Clinical and Experimental*  
1771 *Research*; 21(4):613-9.
- 1772 Alexander, W. (2012). Pharmacotherapy for post-traumatic stress disorder in combat veterans:  
1773 Focus on antidepressants and atypical antipsychotic agents. *P & T*, 37(1), 32–38.
- 1774 Alino, J. (2011). Misleading conclusion from the unifying theory of the stellate ganglion block  
1775 for the treatment of posttraumatic stress disorder. *Medical Hypotheses*, 77(3), 465.  
1776 doi:10.1016/j.mehy.2011.06.038
- 1777 American Psychiatric Association. (2013). *Diagnostic and statistical manual of mental disorders*  
1778 (Fifth ed.). Washington, DC: American Psychiatric Association.
- 1779 Babor, T. F., Higgins-Biddle, J. C., Saunders, J. B., & Monteiro, M. G. (2001). AUDIT: The  
1780 Alcohol Use Disorder Identification Test—Guidelines for Use in Primary Care (2<sup>nd</sup>  
1781 ed.). Geneva, Switzerland: World Health Organization, Department of Mental Health  
1782 and Substance Dependence. Available at:  
1783 [http://whqlibdoc.who.int/hq/2001/who\\_msd\\_msb\\_01.6a.pdf](http://whqlibdoc.who.int/hq/2001/who_msd_msb_01.6a.pdf)
- 1784 Beck, J. G., & Clapp, J. D. (2011). A different kind of comorbidity: Understanding posttraumatic  
1785 stress disorder and chronic pain. *Psychological Trauma: Theory, Research, Practice,*  
1786 *and Policy*, 3(2), 101–108. <http://doi.org/10.1037/a0021263>
- 1787 Brady, K. T., Killeen, T. K., Brewerton, T., & Lucerini, S. (2000). Comorbidity of psychiatric  
1788 disorders and posttraumatic stress disorder. *Journal of Clinical Psychiatry*, 61(Suppl  
1789 7), 22-32.
- 1790 Bray, R. M., Pemberton, M. R., Hourani, L. L., Witt, M., Rae Olmsted, K. L., Brown, J. M.,  
1791 Weimer, B., Lane, M. E., Marsden, M. E., Scheffler, S., Vandermaas-Peeler, R.,  
1792 Aspinwall, K. R., Anderson, E., Spagnola, K., Close, K., Gratton, J. L., Calvin, S., &  
1793 Bradshaw, M. (2009). 2008 Department of Defense survey of health-related behaviors  
1794 among active duty military personnel. Research Triangle Park, NC: RTI International.  
1795 Retrieved from <http://www.tricare.mil/tma/2008HealthBehaviors.pdf>
- 1796 Charles, C., Gafni, A., Whelan, T., & O'Brien, M. A. (2006). Cultural influences on the  
1797 physician–patient encounter: The case of shared treatment decision-making. *Patient*  
1798 *Education and Counseling* 63(3), 262-267.
- 1799 Charles, C., Gafni, A., & Whelan, T. (1999). Decision-making in the physician–patient  
1800 encounter: revisiting the shared treatment decision-making model. *Social Science &*  
1801 *Medicine* 49(5), 651-661.

- 1802 Committee on Treatment of Posttraumatic Stress Disorder, Institute of Medicine. (2008).  
1803 *Treatment of posttraumatic stress disorder: an assessment of the evidence.*  
1804 Washington, DC: National Academies Press.
- 1805 Conybeare, D., Behar, E., Solomon, A., Newman, M. G., & Borkovec, T. D. (2012). The PTSD  
1806 Checklist-Civilian Version: reliability, validity, and factor structure in a nonclinical  
1807 sample. *Journal of Clinical Psychology, 68*(6), 699-713.
- 1808 Dohrenwend, B. P., Turner, J. B., Turse, N. A., Adams, B. G., Koenen, K. C., & Marshall, R.  
1809 (2006). The psychological risks of Vietnam for U.S. veterans: a revisit with new data  
1810 and methods. *Science, 313*(5789), 979-982. doi:10.1126/science.1128944
- 1811 Fletcher, S., Creamer, M., & Forbes, D. (2010). Preventing post traumatic stress disorder: are  
1812 drugs the answer? *Australian and New Zealand Journal of Psychiatry, 44*(12), 1064-  
1813 1071. doi:10.3109/00048674.2010.509858
- 1814 Fung, K. M., Tsang, H. W., & Chan, F. (2010). Self-stigma, stages of change and psychosocial  
1815 treatment adherence among Chinese people with schizophrenia: a path analysis. *Social*  
1816 *Psychiatry and Psychiatric Epidemiology, 45*(5), 561–568. doi:10.1007/s00127-009-  
1817 0098-1
- 1818 Gray, M. J., Elhai, J. D., & Frueh, B. C. (2004). Enhancing patient satisfaction and increasing  
1819 treatment compliance: patient education as a fundamental component of PTSD  
1820 treatment. *Psychiatry Quarterly 75*(4), 321–332.
- 1821 Hicky, A., Hanling, S., Pevney, E., Allen, R., & McLay, R. N. (2012). Stellate ganglion block for  
1822 PTSD. *American Journal of Psychiatry, 169*(7), 760.  
1823 doi:10.1176/appi.ajp.2012.11111729
- 1824 Hoge, C. W., Castro, C. A., Messer, S. C., McGurk, D., Cotting, D. I., & Koffman, R. L. (2004).  
1825 Combat duty in Iraq and Afghanistan, mental health problems, and barriers to care.  
1826 *New England Journal of Medicine, 351*(1), 13–22. doi:10.1056/NEJMoa040603
- 1827 Institute of Medicine (IOM). (2008). *Treatment of posttraumatic stress disorder: An assessment*  
1828 *of the evidence.* Washington, DC: The National Academies Press.
- 1829 Jonas, D. E., Cusack, K., Forneris, C. A., Wilkins, T. M., Sonis, J., Middleton, J. C., Feltner, C.,  
1830 Meredith, D., Cavanaugh, J., Brownley, K. A., Rae Olmsted, K., Greenblatt, A., Weil,  
1831 A., & Gaynes, B. N. (2013). Psychological and pharmacological treatments for adults  
1832 with posttraumatic stress disorder (PTSD). Comparative Effectiveness Review No. 92.  
1833 (Prepared by the RTI International-University of North Carolina Evidence-based  
1834 Practice Center under Contract No. 290-2007-10056-I.) AHRQ Publication No. 13-  
1835 EHC011-EF). (Prepared by the RTI International–University of North Carolina  
1836 Evidence-based Practice Center under Contract No. 290-2007-10056-I.) AHRQ  
1837 Publication No. 13-EHC011-EF. Rockville, MD: Agency for Healthcare Research and  
1838 Quality. Retrieved from [www.effectivehealthcare.ahrq.gov/reports/final.cfm](http://www.effectivehealthcare.ahrq.gov/reports/final.cfm)

- 1839 Kessler, R. C., Andrews, G., Colpe, L. J., Hiripi, E., Mroczek, D. K., Normand, S-LT., Walters,  
1840 E. E., & Zaskavsky, A. (2002). Short screening scales to monitor population  
1841 prevalences and trends in nonspecific psychological distress. *Psychological Medicine*,  
1842 *32*, 959-976.
- 1843 Kessler, R. C. (2000). Posttraumatic stress disorder: the burden to the individual and to society.  
1844 *Journal of Clinical Psychiatry*, *61*(Suppl 5), 4-12; discussion 13-14.
- 1845 Kessler, R. C., Barker, P. R., Colpe, L. J., Epstein, J. F., Gfroerer, J. C., Hiripi, E., Howes, M. J.,  
1846 Normand, S-L.T., Manderscheid, R. W., Walters, E. E., Zaslavsky, A. M. (2003).  
1847 Screening for serious mental illness in the general population. *Archives of General*  
1848 *Psychiatry*, *60*(2), 184-189.
- 1849 Kim, P. Y., Britt, T. W., Klocko, R. P., Riviere, L. A., & Adler, A. B. (2011). Stigma, negative  
1850 attitudes about treatment, and utilization of mental health care among soldiers.  
1851 *Military Psychology*, *23*(1), 65–81. doi:10.1080/08995605.2011.534415
- 1852 Kroenke, K., Spitzer, R. L., Williams, J. B. W., Monahan, P. O., & Löwe, B. (2007). Anxiety  
1853 disorders in primary care: prevalence, impairment, comorbidity, and detection. *Annals*  
1854 *of Internal Medicine*, *146*, 317-325.
- 1855 Kroenke, K., Spitzer, R. L., Williams, J. B. W. (2001). The PHQ-9: Validity of a brief depression  
1856 severity measure. *Journal of General Internal Medicine*, *16*, 606-613.
- 1857 Kroenke, K., & Spitzer, R. L. (2002). The PHQ-9: a new depression diagnostic and severity  
1858 measure. *Psychiatric Annals*, *32*, 509-521.
- 1859 Kronish, I. M., Edmondson, D., Li, Y., & Cohen, B. E. (2012). Post-traumatic stress disorder and  
1860 medication adherence: results from the Mind Your Heart Study. *Journal of Psychiatric*  
1861 *Research*, *46*(12), 1595–1599. doi:10.1016/j.jpsychires.2012.06.011
- 1862 Krueger, R.A., & M.A. Casey, M. A. (2000). *Focus groups. A practical guide for applied*  
1863 *research*. Thousand Oaks, CA: Sage.
- 1864 Kulich, R. J., Mencher, P., Bertrand, C., & Maciewicz, R. (2000). Comorbidity of post-traumatic  
1865 stress disorder and chronic pain: Implications for clinical and forensic assessment.  
1866 *Current Review of Pain*, *4*(1), 36–48. <http://doi.org/10.1007/s11916-000-0008-4>
- 1867 Lebovits, A. H., Yarmush, J., & Lefkowitz, M. (1990). Reflex sympathetic dystrophy and  
1868 posttraumatic stress disorder. Multidisciplinary evaluation and treatment. *Clinical*  
1869 *Journals of Pain*, *6*(2), 153–157.
- 1870 Liberzon, I., & Martis, B. (2006). Neuroimaging studies of emotional responses in PTSD. *Annals*  
1871 *of New York Academy of Science*, *1071*, 87–109. doi:10.1196/annals.1364.009

- 1872 Lipov, E. G., Joshi, J. R., Lipov, S., Sanders, S. E., & Siroko, M. K. (2008). Cervical  
1873 sympathetic blockade in a patient with post-traumatic stress disorder: a case report.  
1874 *Annals of Clinical Psychiatry*, 20(4), 227–228. doi:10.1080/10401230802435518
- 1875 Lipov, E. G., Joshi, J. R., Sanders, S., & Slavin, K. V. (2009). A unifying theory linking the  
1876 prolonged efficacy of the stellate ganglion block for the treatment of chronic regional  
1877 pain syndrome (CRPS), hot flashes, and posttraumatic stress disorder (PTSD). *Medical  
1878 Hypotheses*, 72(6), 657–661. doi:10.1016/j.mehy.2009.01.009
- 1879 Löwe B, Unutzer J, Callahan CM, Perkins AJ, Kroenke K. Monitoring depression treatment  
1880 outcomes with the Patient Health Questionnaire-9. *Med Care* 2004;42:1194-1201.
- 1881 McLay, R. N., Hanling, S., Hickey, A., Drastal, C. A., Adams, G., Lesnik, I., & Stedje-Larsen, E.  
1882 (2015). Stellate ganglion block for treatment of PTSD: A randomized double blinded  
1883 controlled trial. Presented at American Academy of Pain Medicine 2015 Annual  
1884 Meeting, National Harbor, MD.
- 1885 Moeller-Bertram, T., Keltner, J., & Strigo, I. A. (2012). Pain and post traumatic stress disorder –  
1886 Review of clinical and experimental evidence. *Neuropharmacology*, 62(2), 586–597.  
1887 <http://doi.org/10.1016/j.neuropharm.2011.04.028>
- 1888 Mulvaney, S. W., Lynch, J. H., Hickey, M. J., Rahman-Rawlins, T., Schroeder, M., Kane, S., &  
1889 Lipov, E. (2014). Stellate ganglion block used to treat symptoms associated with  
1890 combat-related post-traumatic stress disorder: a case series of 166 patients. *Military  
1891 Medicine*, 179(10), 1133-1140.
- 1892 Mulvaney, S. W., McLean, B., & de Leeuw, J. (2010). The use of stellate ganglion block in the  
1893 treatment of panic/anxiety symptoms with combat-related post-traumatic stress  
1894 disorder; preliminary results of long-term follow-up: a case series. *Pain Practice*,  
1895 10(4), 359–365. doi:10.1111/j.1533-2500.2010.00373.x
- 1896 Nozdrachev, A. D., Fateev, M. M., Jimenez, B., & Morales, M. A. (2003). Circuits and  
1897 projections of cat stellate ganglion. *Archives of Medical Research*, 34(2), 106-115.  
1898 doi:10.1016/S0188-4409(03)00017-1
- 1899 Oldfield, B. J., & McLachlan, E. M. (1978). Localization of sensory neurons traversing the  
1900 stellate ganglion of the cat. *Journal of Comparative Neurology*, 182(4 Pt 2), 915-922.
- 1901 Patient Health Questionnaire Screeners. (n.d.) Instruction manual for Patient Health Questionnaire  
1902 (PHQ) and GAD-7 measures. Available at:  
1903 <http://www.phqscreeners.com/instructions/instructions.pdf>
- 1904 Polak, L. & Green, J. (2015). *Using joint interviews to add analytic value. Qualitative Health  
1905 Research*, pii. 1049732315580103.
- 1906 QSR International, *NVivo (Version 9)*, Doncaster, Victoria, Australia: QSR International.

- 1907 Rae Olmsted, K. L., Brown, J. M., Vandermaas-Peeler, J. R., Tueller, S. J., Johnson, R. E., &  
1908 Gibbs, D. A. (2011). Mental health and substance abuse treatment stigma among  
1909 soldiers. *Military Psychology, 23*(1), 52–64.
- 1910 Ranson, R. N., Motawei, K., Pyner, S., & Coote, J. H. (1998). The paraventricular nucleus of the  
1911 hypothalamus sends efferents to the spinal cord of the rat that closely appose  
1912 sympathetic preganglionic neurones projecting to the stellate ganglion. *Experimental*  
1913 *Brain Research, 120*(2), 164-172.
- 1914 Rauch, S. A., Eftekhari, A., & Ruzek, J. I. (2012). Review of exposure therapy: a gold standard  
1915 for PTSD treatment. *Journal of Rehabilitative Research and Development, 49*(5), 679–  
1916 687.
- 1917 Rauch, S. L., Whalen, P. J., Shin, L. M., McInerney, S. C., Macklin, M. L., Lasko, N. B., Orr, S.  
1918 P., & Pitman, R. K. (2000). Exaggerated amygdala response to masked facial stimuli  
1919 in posttraumatic stress disorder: a functional MRI study. *Biological Psychiatry, 47*(9),  
1920 769–776.
- 1921 Saunders, J. B., Aasland, O. G., Amundsen, A., Grant, M. (1993). Alcohol consumption and  
1922 related problems among primary health care patients: WHO collaborative project on  
1923 early detection of persons with harmful alcohol consumption—I. *Addiction, 88*(3),  
1924 349-362.
- 1925 Sayer, N. A., Friedmann-Sanchez, G., Spont, M., Murdoch, M., Parker, L. E., Chiros, C.,  
1926 Rosenheck, R. (2009). A qualitative study of determinants of PTSD treatment  
1927 initiation in veterans. *Psychiatry, 72*(3), 238-255.
- 1928 SF-36.org. (n.d.). **The SF-12®: An Even Shorter Health Survey. Available at:** [http://www.sf-](http://www.sf-36.org/tools/sf12.shtml)  
1929 [36.org/tools/sf12.shtml](http://www.sf-36.org/tools/sf12.shtml)
- 1930 Sharpless, B. A., & Barber, J. P. (2011). A clinician’s guide to PTSD treatments for returning  
1931 veterans. *Professional Psychology: Research and Practice, 42*(1), 8–15.  
1932 doi:10.1037/a0022351
- 1933 Sheehan, D. V., Lecrubier, Y., Sheehan, K. H., Amorim, P., Janavs, J., Weiller, E., Hergueta, T.,  
1934 Baker, R., Dunbar, G. C. (1998). The Mini-International Neuropsychiatric Interview  
1935 (M.I.N.I.): the development and validation of a structured diagnostic psychiatric  
1936 interview for DSM-IV and ICD-10. *Journal of Clinical Psychiatry, 59*(Suppl 20), 22-  
1937 33;quiz 34-57.
- 1938 Shiner, B., D’Avolio, L. W., Nguyen, T. M., Zayed, M. H., Young-Xu, Y., Desai, R. A.,  
1939 Schnurr, P. P., Fiore, L. D., Watts, B. V. (2013). Measuring use of evidence based  
1940 psychotherapy for posttraumatic stress disorder. *Administration and Policy in Mental*  
1941 *Health and Mental Health Services Research, 40*(4), 311-318.



- 1942 Spitzer, R. L., Kroenke, K., Williams, J. B. W., & Löwe, B. (2006). A brief measure for  
1943 assessing generalized anxiety disorder: the GAD-7. *Archives of Internal Medicine*  
1944 *166*,1092-1097.
- 1945 Spitzer, R. L., Williams, J. B. W., Kroenke, K., Linzer, M., deGruy, F. V., Hahn, S. R., Brody,  
1946 D., & Johnson, J. G. (1994). Utility of a new procedure for diagnosing mental  
1947 disorders in primary care: The PRIME-MD 1000 study. *JAMA*, *272*, 1749-1756.
- 1948 Spont, M., Sayer, N., & Nelson, D. B. (2005). PTSD and treatment adherence: the role of health  
1949 beliefs. *Journal of Nervous and Mental Disease*, *193*(8), 515–522.
- 1950 Tanielian, T., & Jaycox, L. H. (Eds.). (2008). Invisible wounds of war: Psychological and  
1951 cognitive injuries, their consequences, and services to assist recovery. Arlington, VA:  
1952 RAND Corporation.
- 1953 Tarrier, N., Liversidge, T., & Gregg, L. (2006). The acceptability and preference for the  
1954 psychological treatment of PTSD. *Behavior Research and Therapy*, *44*(11), 1643–  
1955 1656. doi:10.1016/j.brat.2005.11.012
- 1956 Uchida, K., Tateda, T., & Hino, H. (2002). Novel mechanism of action hypothesized for stellate  
1957 ganglion block related to melatonin. *Medical Hypotheses*, *59*(4), 446–449.
- 1958 U. S. Department of Veterans Affairs. (2017, March 9). Clinician-Administered PTSD Scale for  
1959 DSM-5 (CAPS-5) - PTSD: National Center for PTSD [General Information].  
1960 Retrieved February 22, 2018, from  
1961 <https://www.ptsd.va.gov/professional/assessment/adult-int/caps.asp>
- 1962 Vogt, D. (2011). Mental health-related beliefs as a barrier to service use for military personnel  
1963 and veterans: A review. *Psychiatric Services*, *62*(2), 135-142.
- 1964 Ware, J. E., Kosinski, M., & Keller, S. D. (1996). A 12-Item Short-Form Health Survey:  
1965 Construction of scales and preliminary tests of reliability and validity. *Medical Care*,  
1966 *34*(3), 220-233.
- 1967 Weathers, F. W., Bovin, M. J., Lee, D. J., Sloan, D. M., Schnurr, P. P., Kaloupek, D. G., ...  
1968 Marx, B. P. (2017). The Clinician-Administered PTSD Scale for DSM-5 (CAPS-5):  
1969 Development and Initial Psychometric Evaluation in Military Veterans. *Psychological*  
1970 *Assessment*. <https://doi.org/10.1037/pas0000486>
- 1971 Weathers, F. W., Blake, D. D., Schnurr, P. P., Kaloupek, D. G., Marx, B. P. & Keane, T. M.  
1972 (2013). The Clinician-Administered PTSD Scale for the DSM-5. Boston, MA: The  
1973 National Center for PTSD.
- 1974 Weathers, F. W., Keane, T. M., & Davidson, J. R. (2001). Clinician-administered PTSD scale: a  
1975 review of the first ten years of research. *Depress Anxiety*, *13*(3), 132-156.

- 
- 1976 Weathers, F. W., Litz, B. T., Keane, T. M., Palmieri, P. A., Marx, B. P., & Schnurr, P. P. (2013).  
1977 The PTSD Checklist for DSM-5 (PCL-5).  
1978 <http://www.ptsd.va.gov/professional/assessment/adult-sr/ptsd-checklist.asp>
- 1979 Weathers, F. W., Litz, B. T., Herman, D. S., Huska, J. A., & Keane, T. M. (1993, October). The  
1980 PTSD Checklist (PCL): Reliability, validity, and diagnostic utility. Paper presented at  
1981 the Annual Meeting of International Society for Traumatic Stress Studies, San  
1982 Antonio, TX.
- 1983 Williamson, A., & Hoggart, B. (2005). Pain: a review of three commonly used pain rating scales.  
1984 *Journal of Clinical Nursing, 14*(7),798-804.
- 1985 Wulf, H., & Maier, C. (1992). Complications and side effects of stellate ganglion blockade.  
1986 Results of a questionnaire survey. *Anaesthetist, 41*(3), 146-151.
- 1987  
1988  
1989
