# Supplementary material
Source: PubMed Central journal article supplement (PMC6865253)
Supplement: jamapsychiatry-77-130-s003.pdf [file jamapsychiatry-77-130-s003.pdf]

## Data Sharing Statement

Rae Olmsted. Effect of Stellate Ganglion Block Treatment on Posttraumatic Stress Disorder Symptoms. *JAMA Psychiatry*. Published November 06, 2019. 10.1001/jamapsychiatry.2019.3474

### Data

**Data available:** No
